# Supplementary material for: Microwave-assisted one-pot two-step imine formation–hetero-Diels–Alder–detosylation/aromatization sequence: direct access to dibenzo[b,h][1,6]naphthyridines
Source: Royal Society of Chemistry journal article supplement (doi:10.1039/d2ob01216b), 2022-01-01

**Microwave-Assisted One-Pot Two-Step Imine Formation–Hetero-Diels-Alder–  
Detosylation/Aromatization Sequence: Direct Access to  
Dibenzo[*b,h*][1,6]naphthyridines**

Gowsia Jan,<sup>a</sup> Atul Kumar,<sup>a</sup> Muthu Karuppasamy,<sup>a</sup> Diksha Rajput,<sup>a</sup> Nancy Slathia,<sup>b</sup> Kamal K. Kapoor,<sup>b</sup> and Vellaisamy Sridharan\*<sup>a</sup>

<sup>a</sup>*Department of Chemistry and Chemical Sciences, Central University of Jammu, Rahya-Suchani (Bagla), District-Samba, Jammu-181143, J&K, India. E-mail: vesridharan@gmail.com; sridharan.che@cuammu.ac.in*

<sup>b</sup>*Department of Chemistry, University of Jammu, Jammu-180006, J&K, India.*

**Supporting Information**

**Table of Contents**

|   |                                                |    |
|---|------------------------------------------------|----|
| 1 | <sup>1</sup> H and <sup>13</sup> C NMR Spectra | S2 |
|---|------------------------------------------------|----|

# 1. <sup>1</sup>H and <sup>13</sup>C NMR Spectra

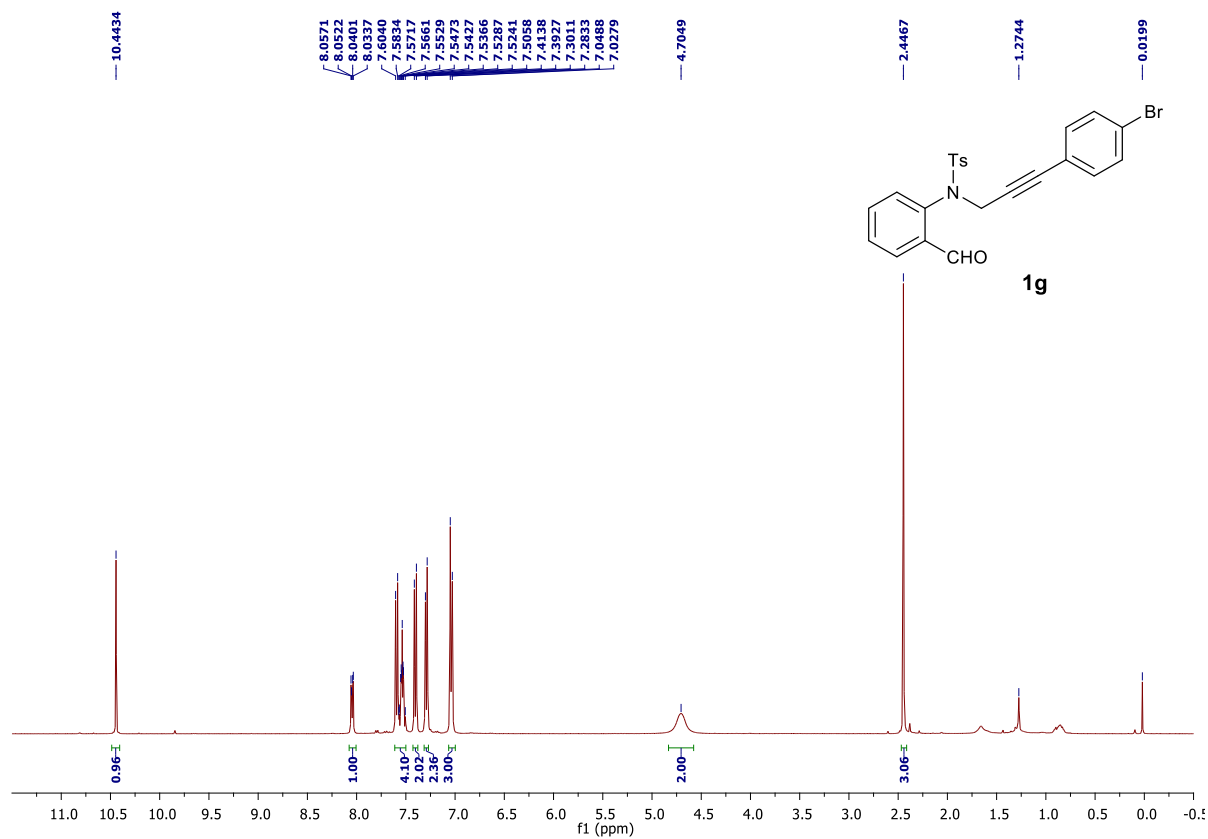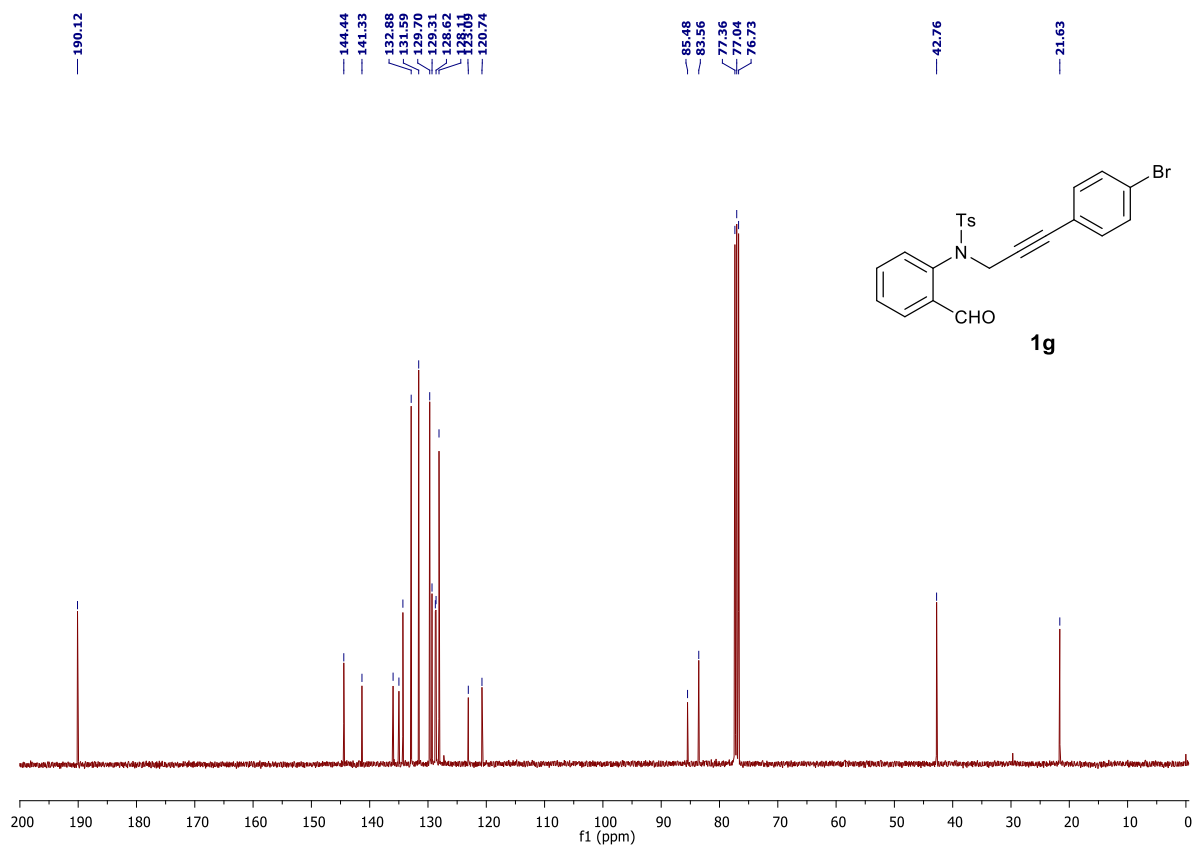

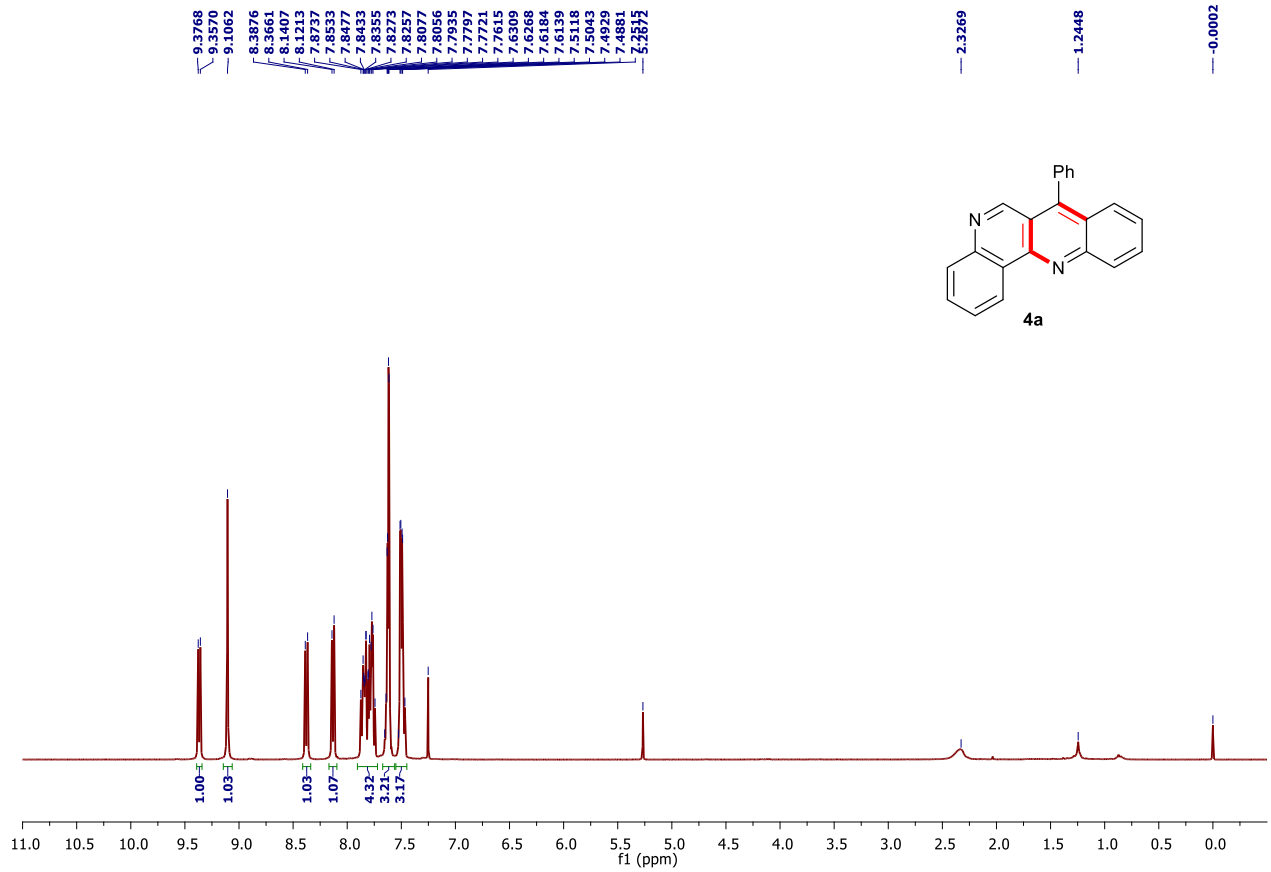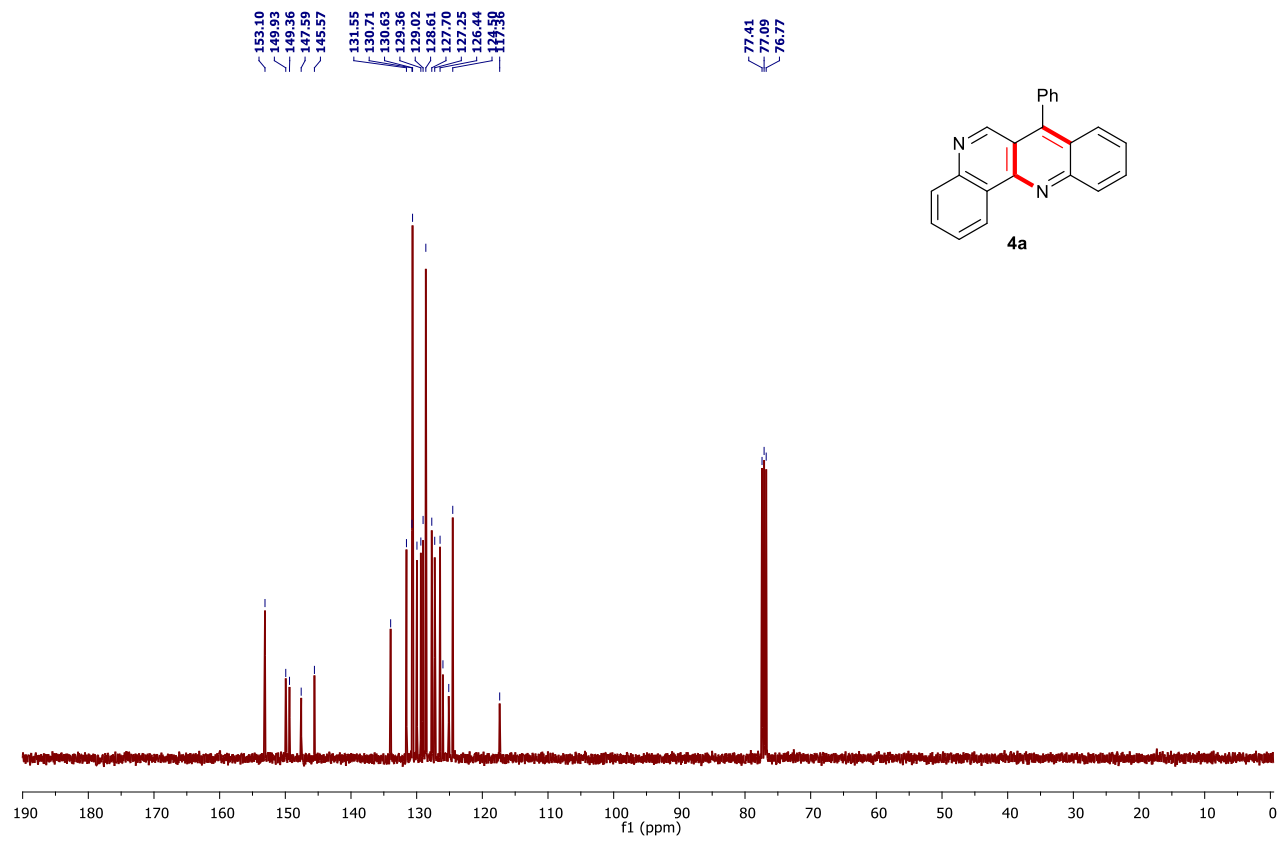

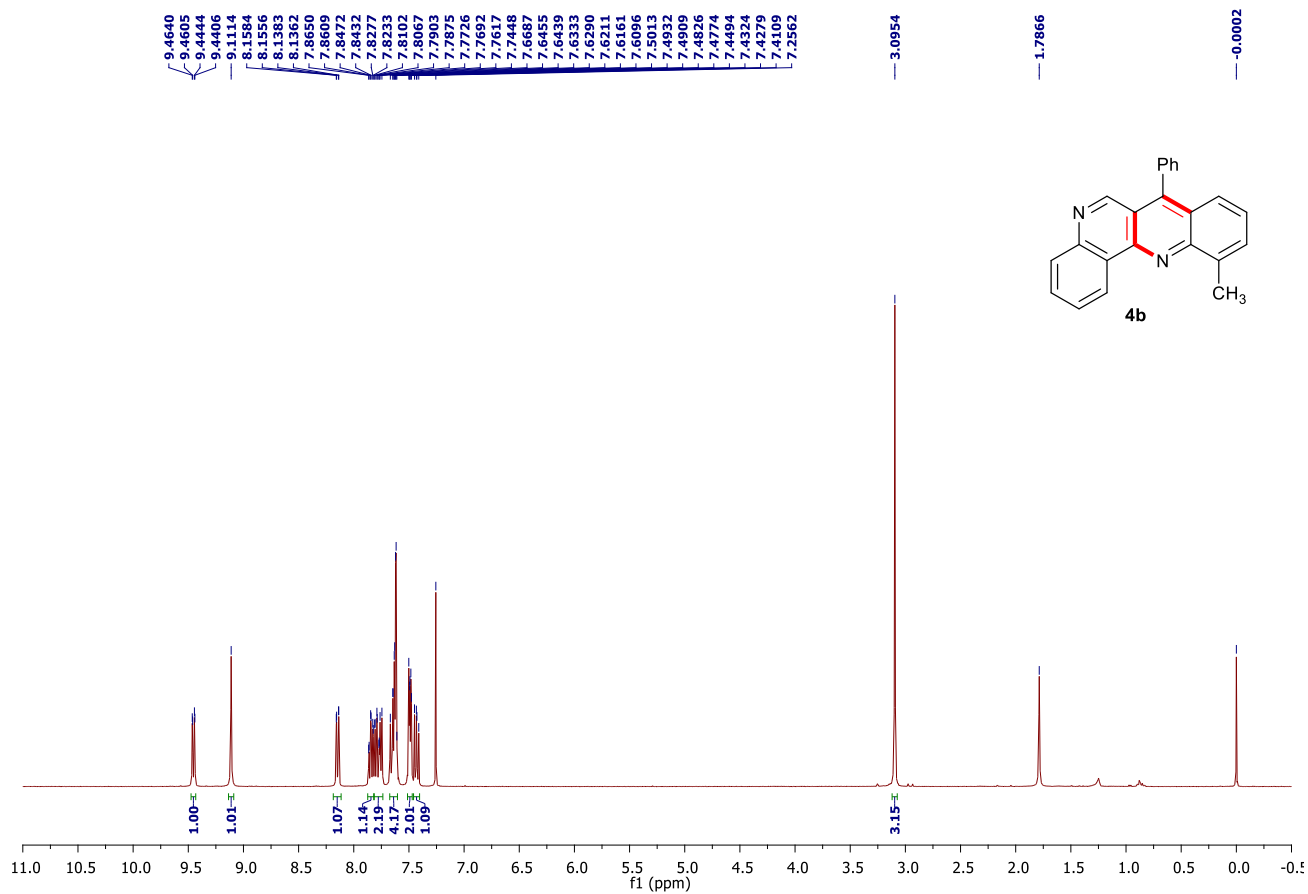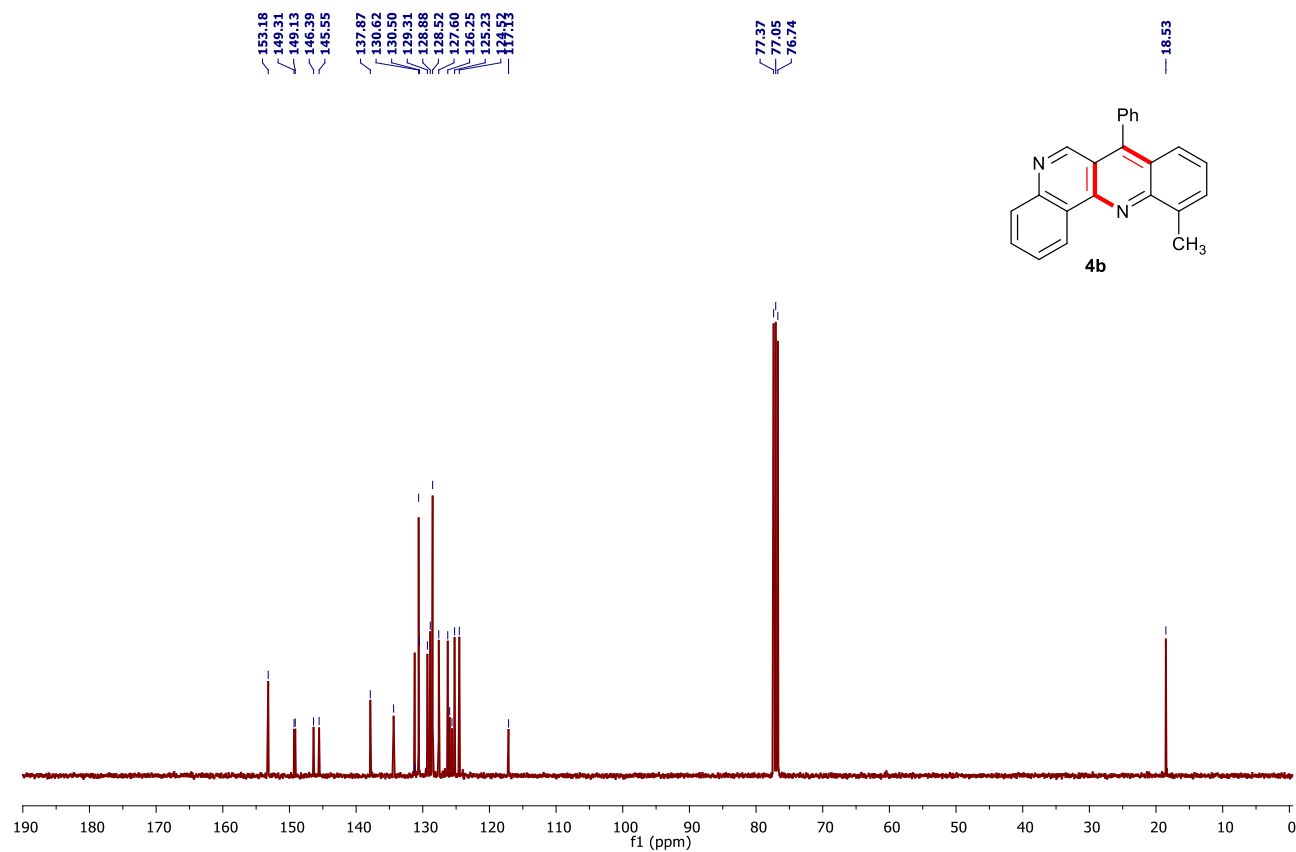

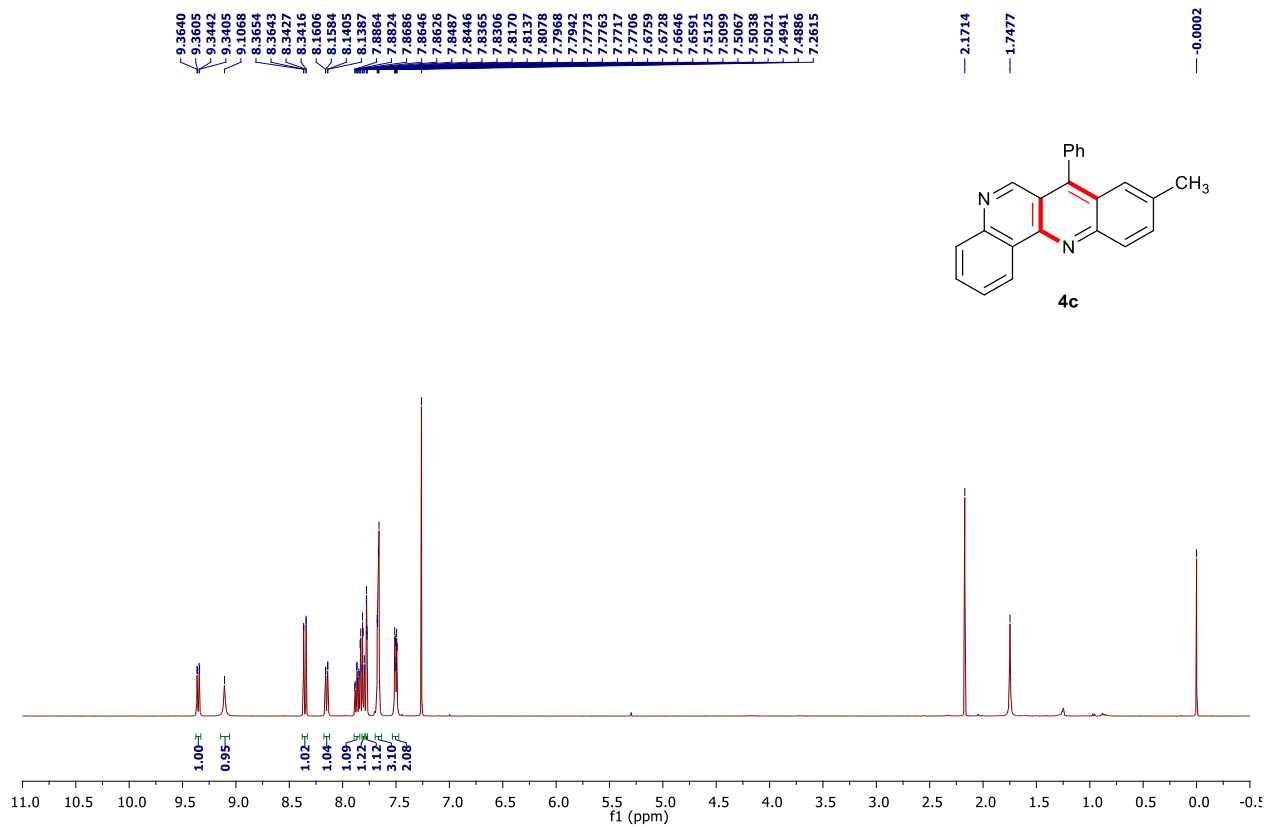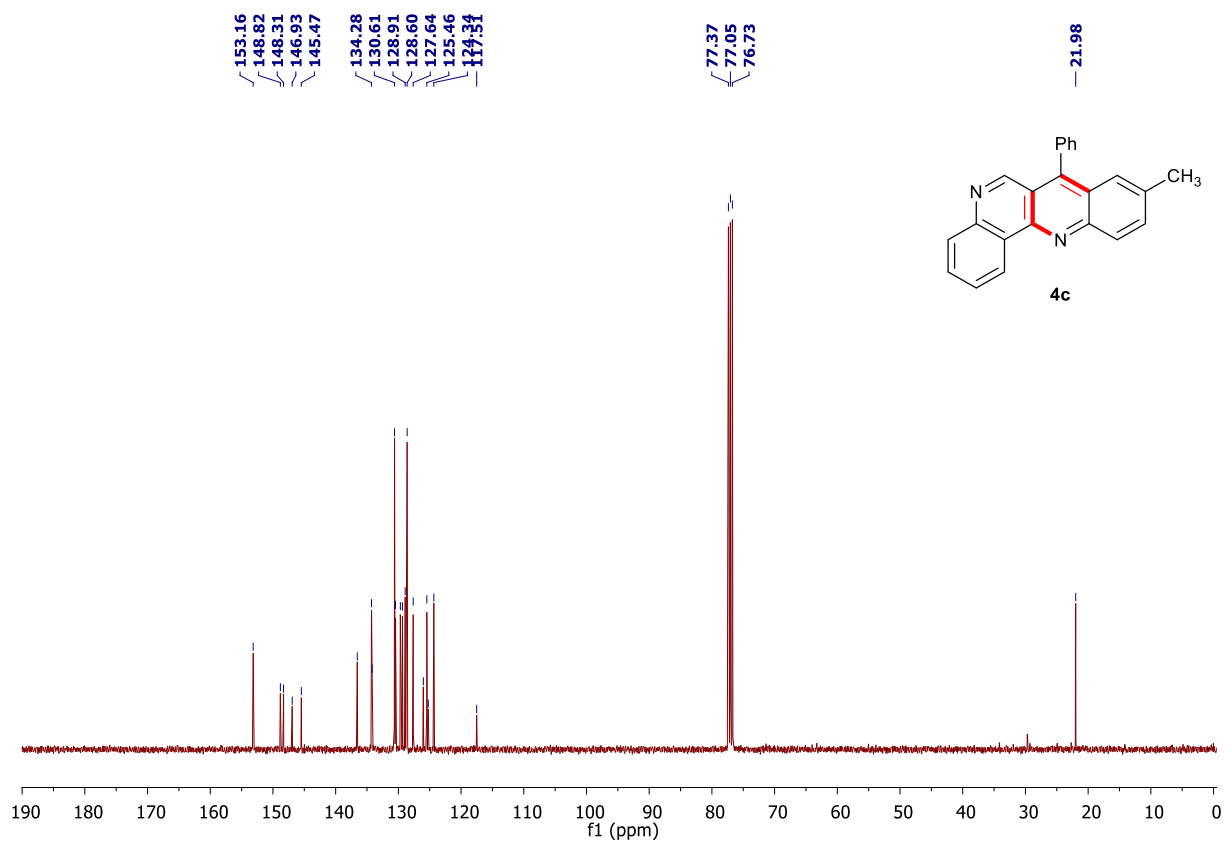

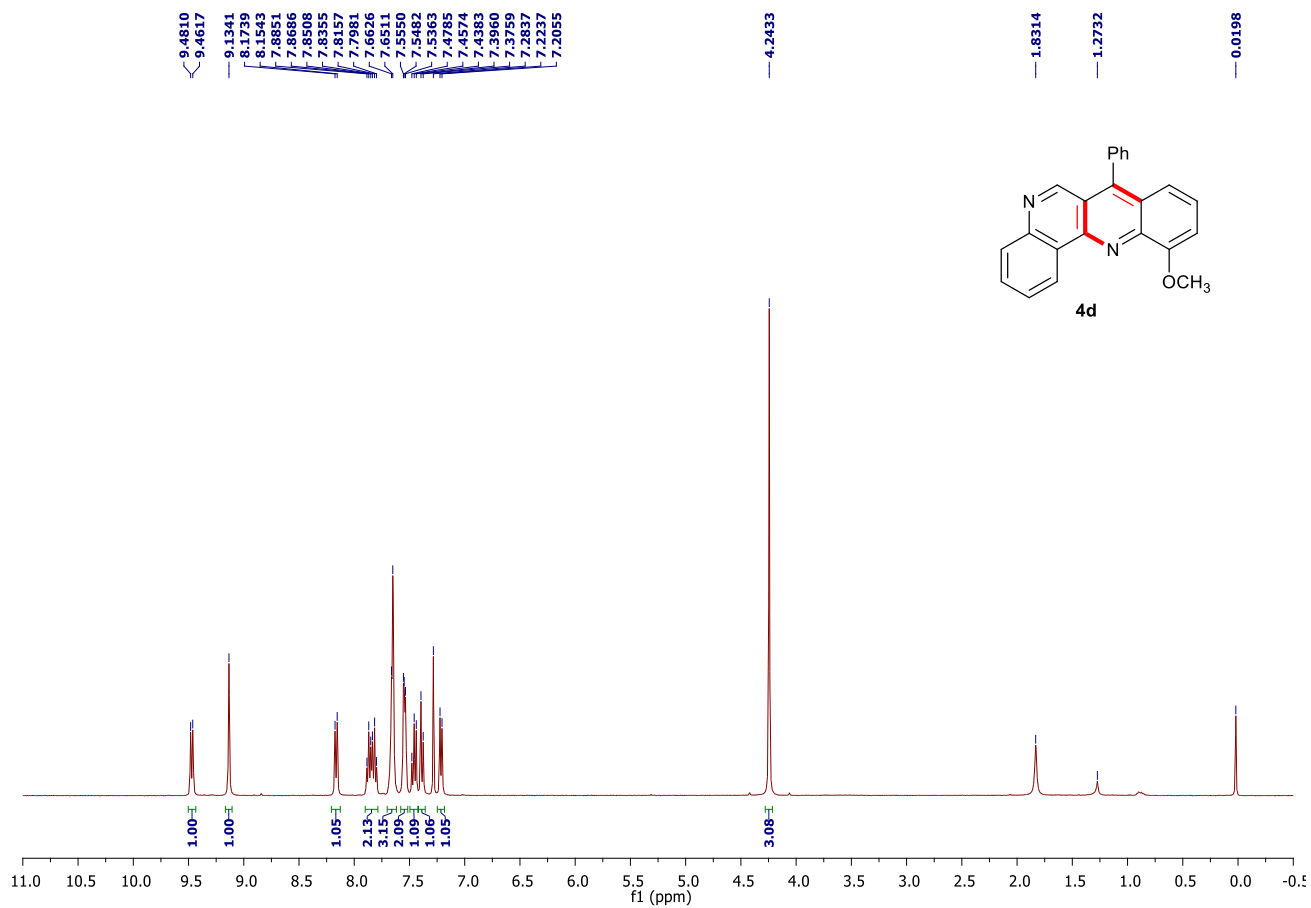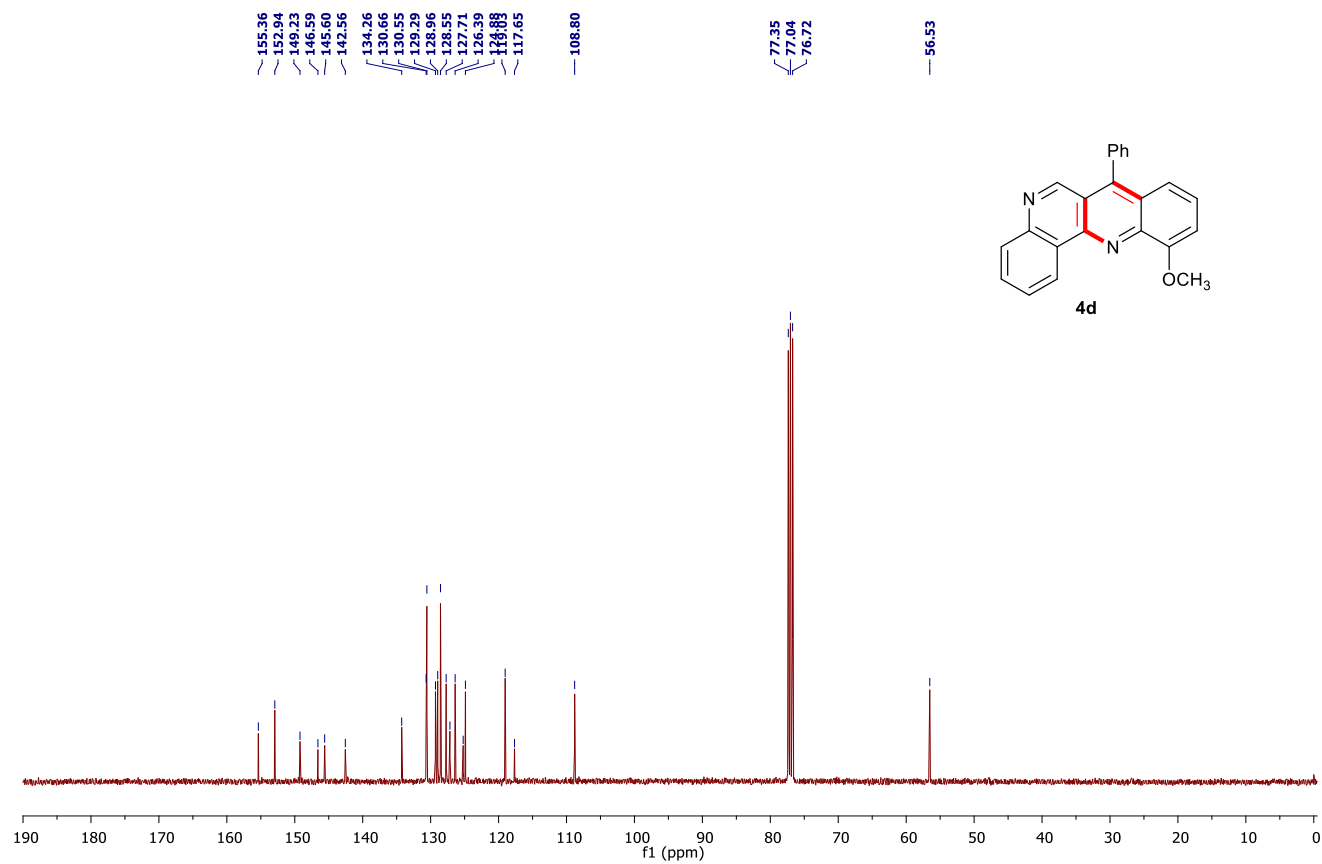

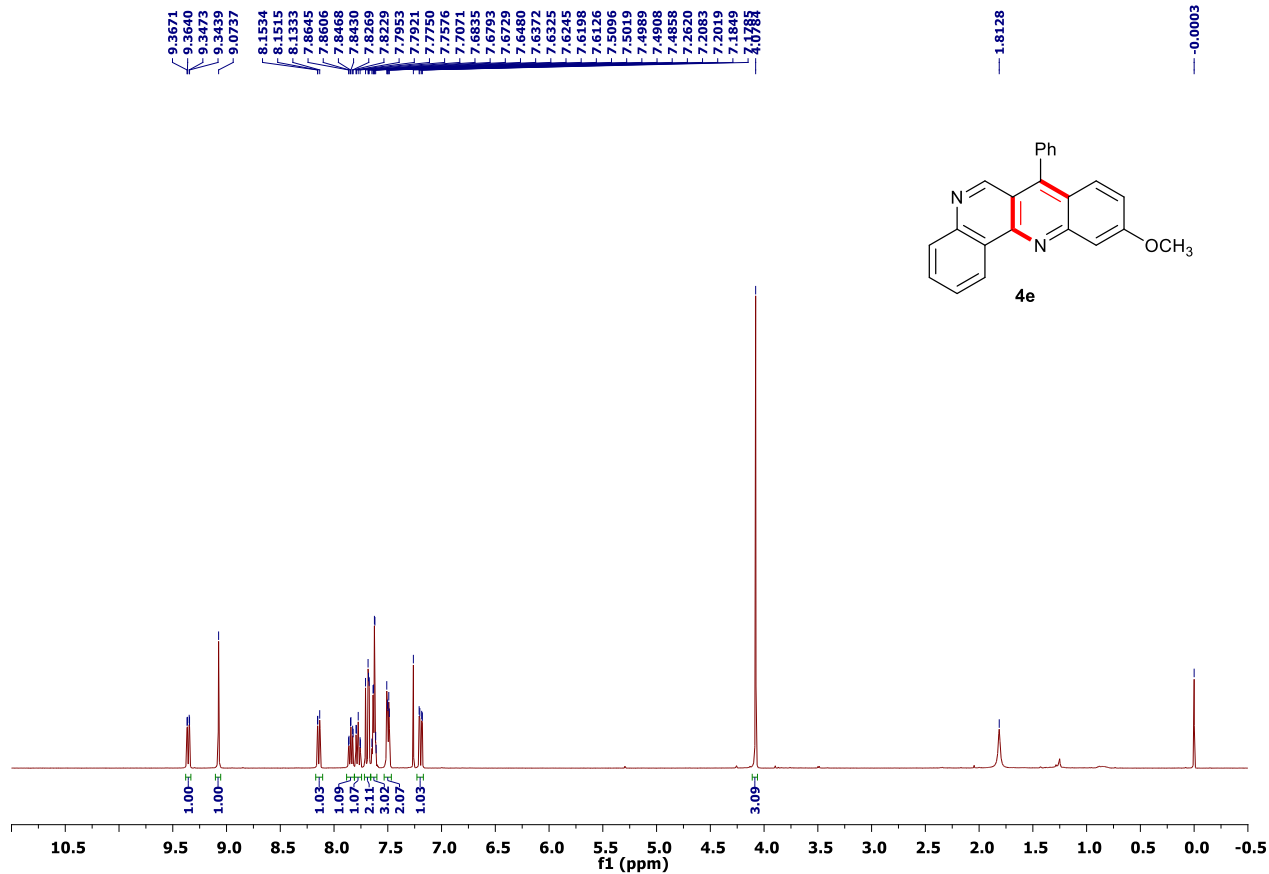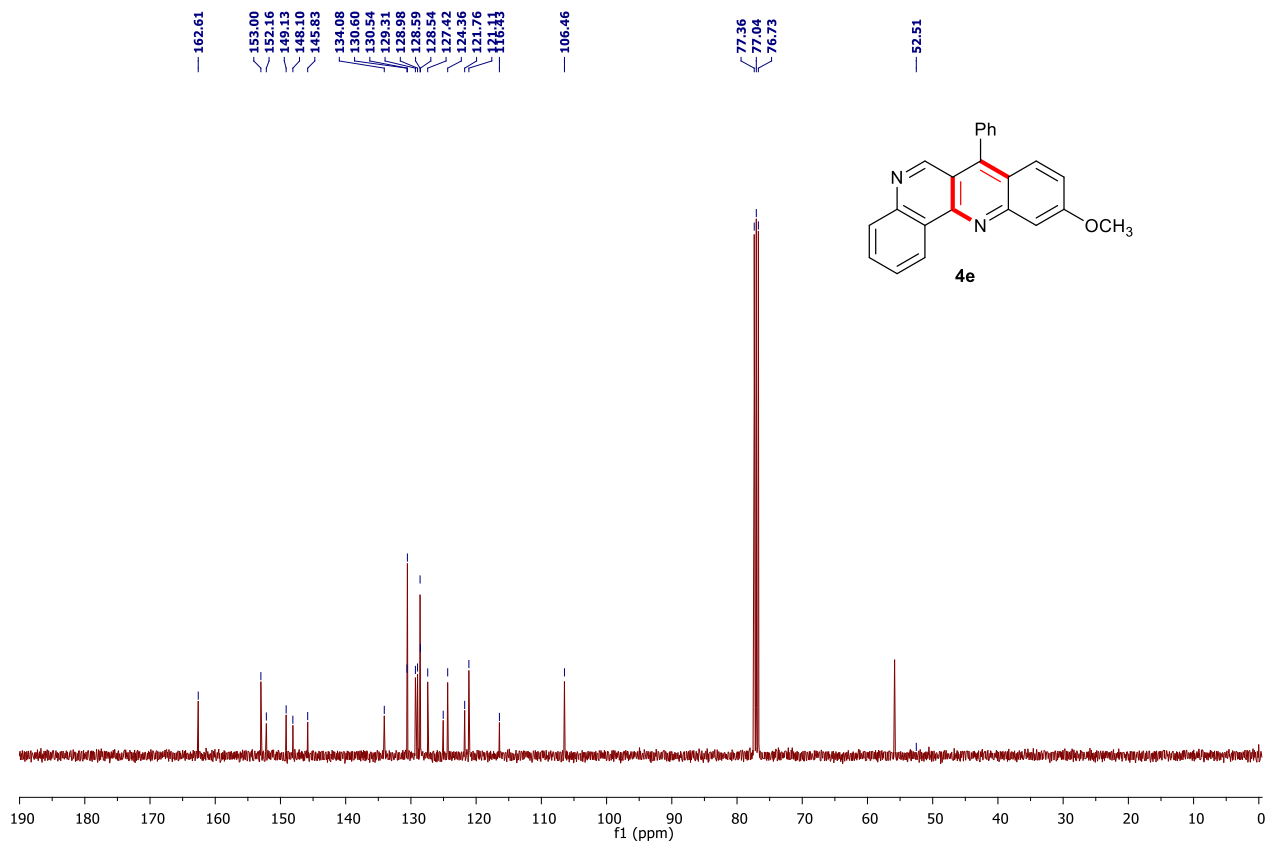

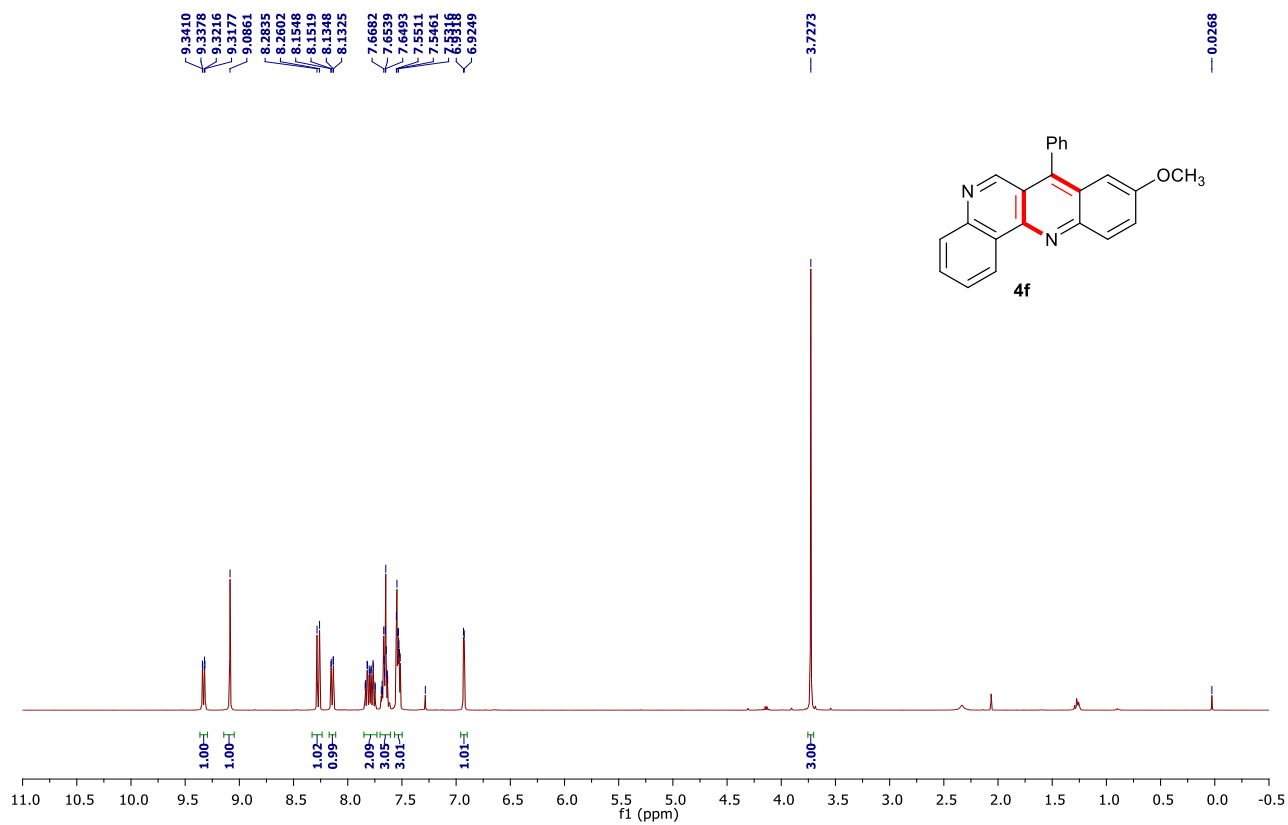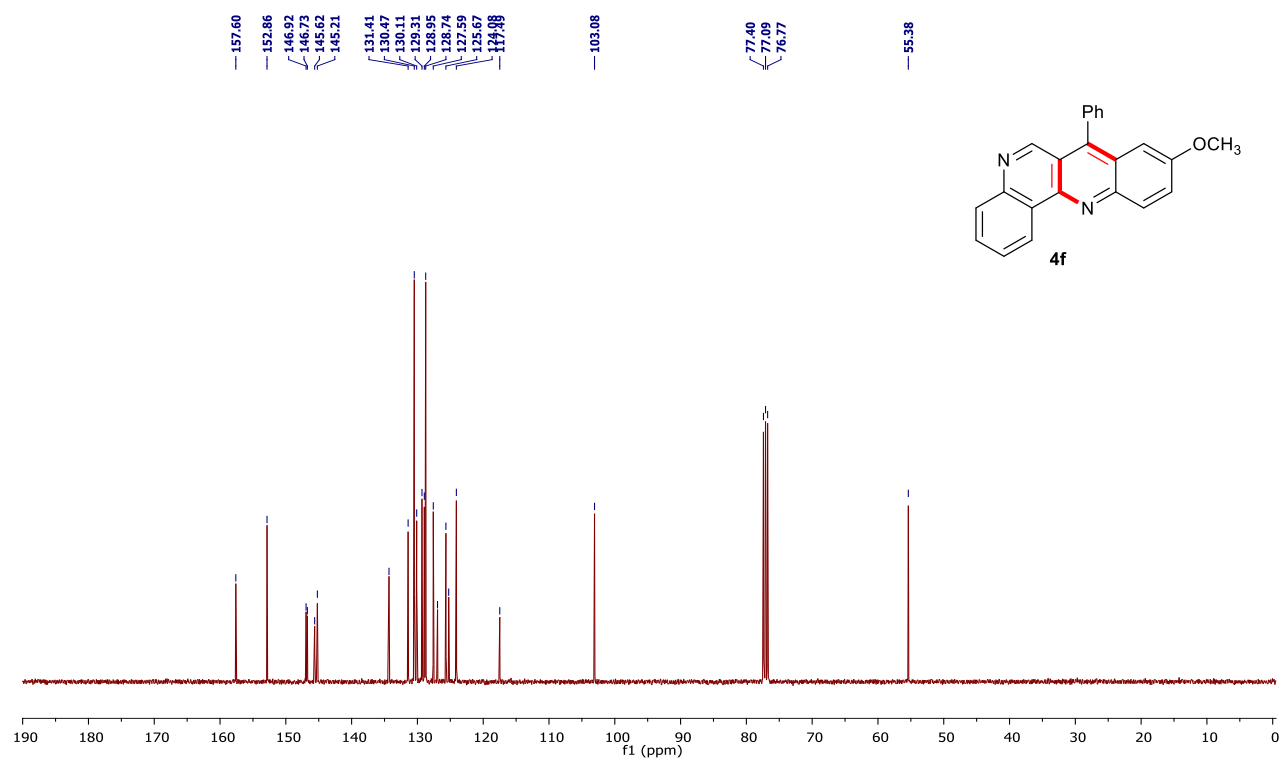



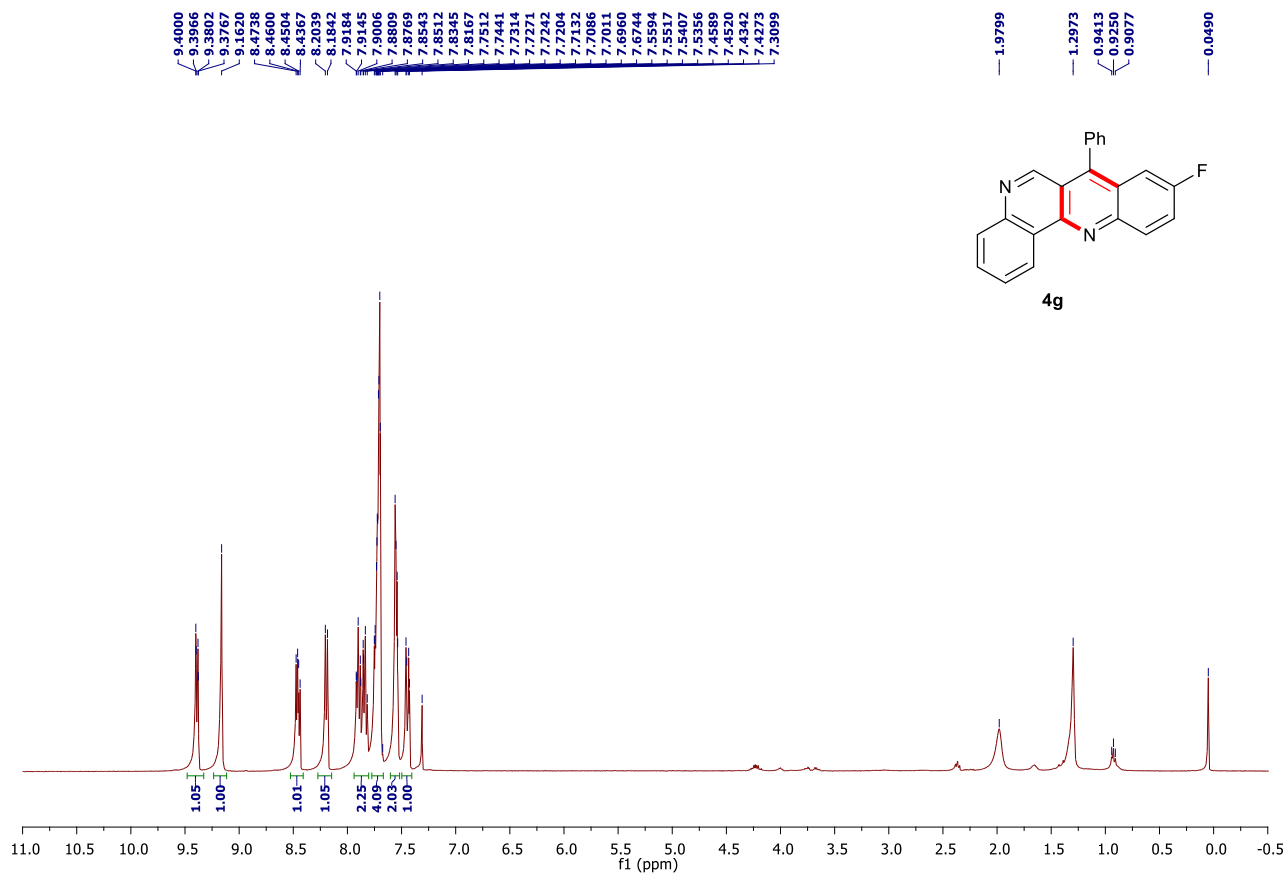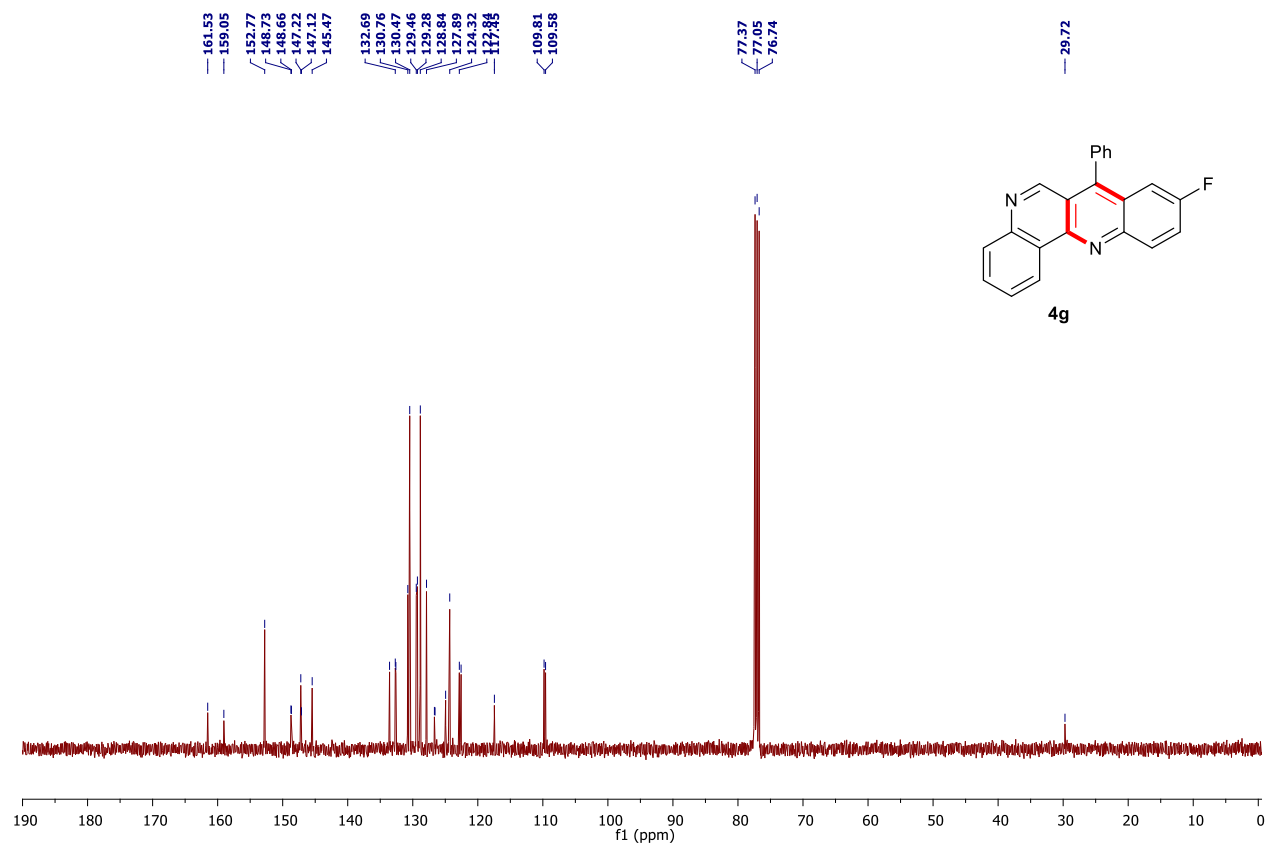

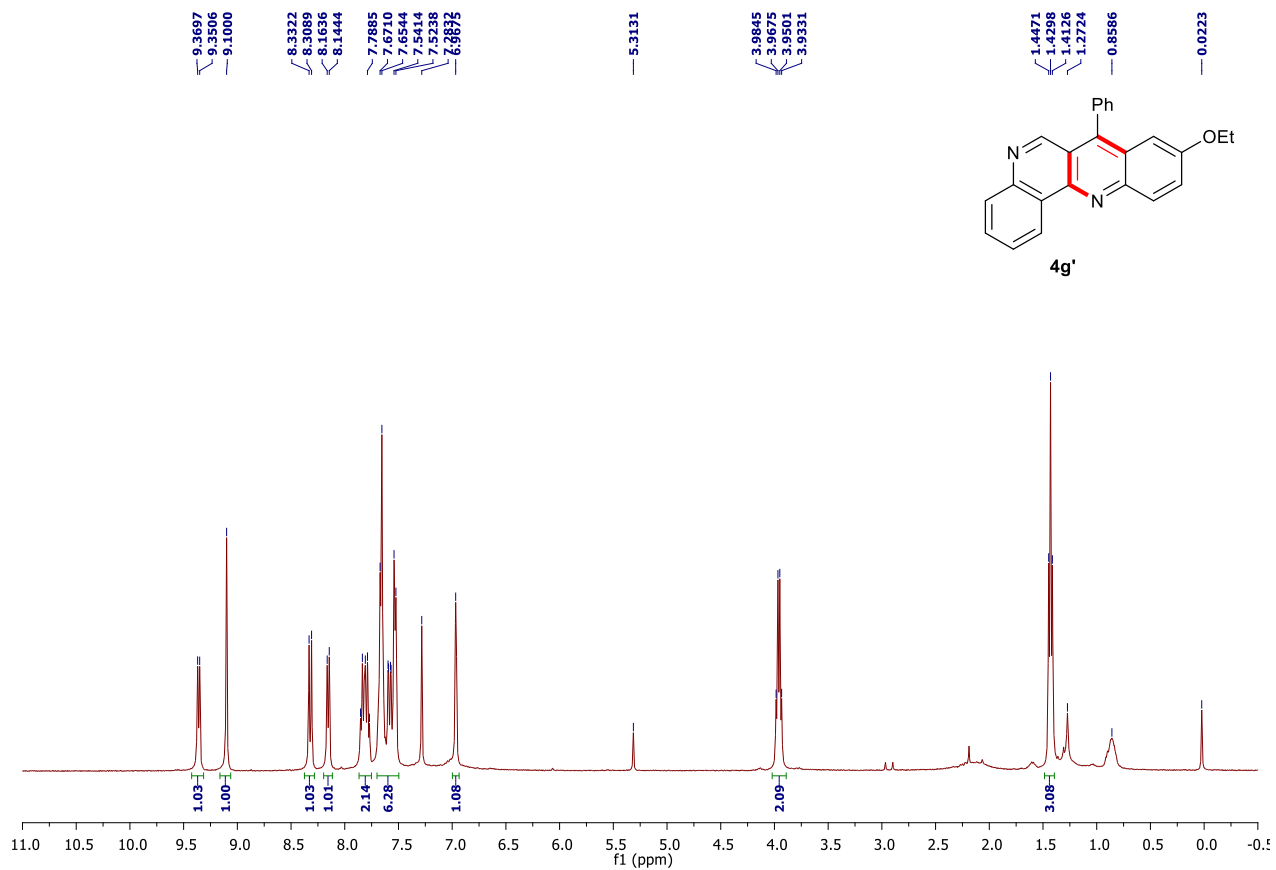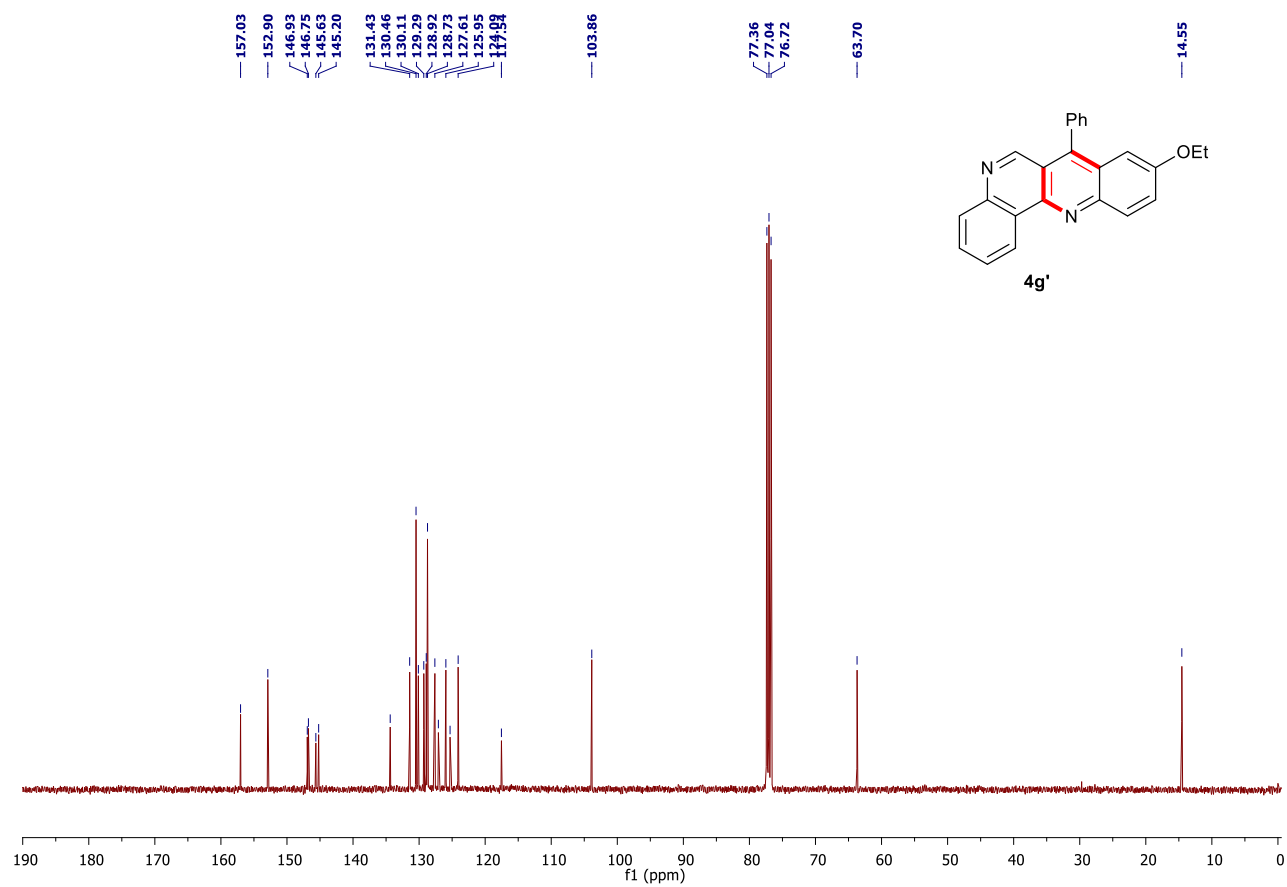

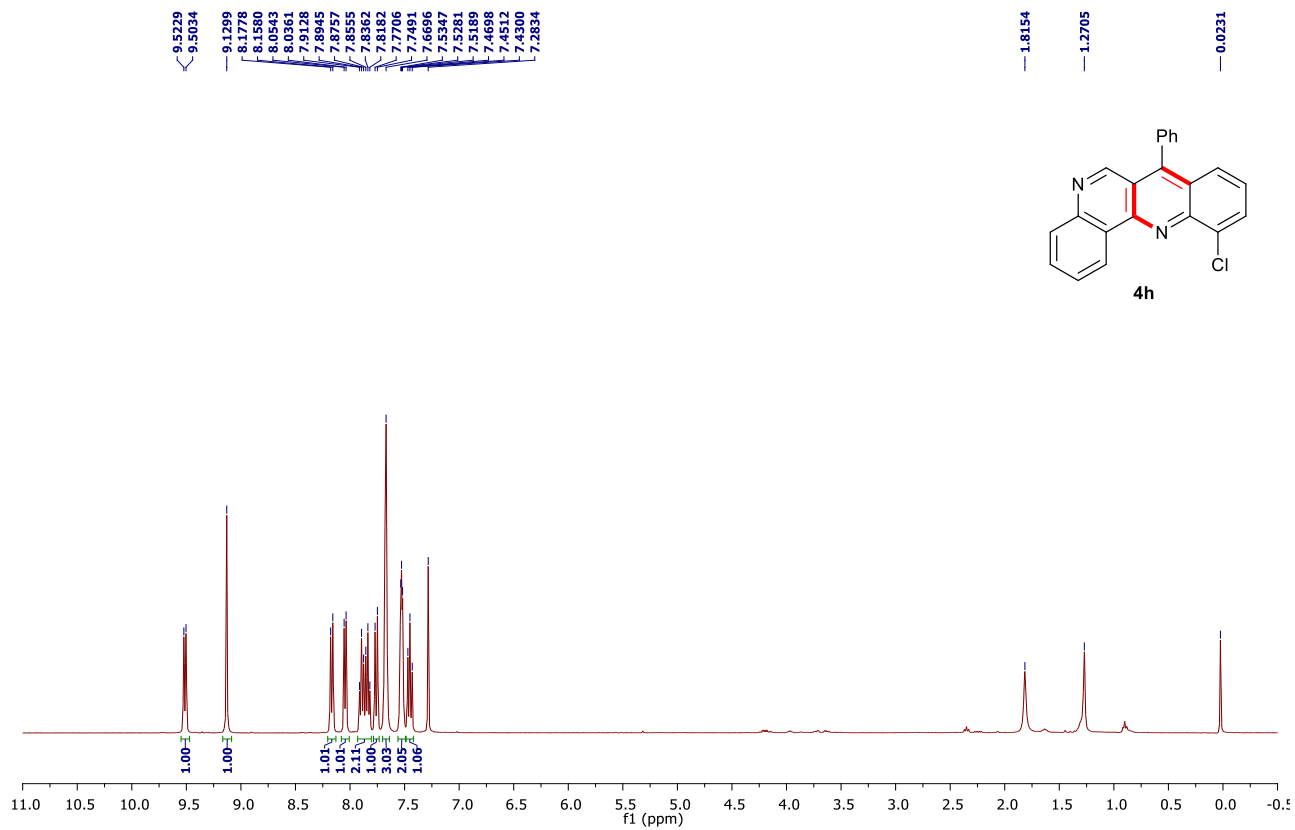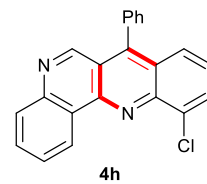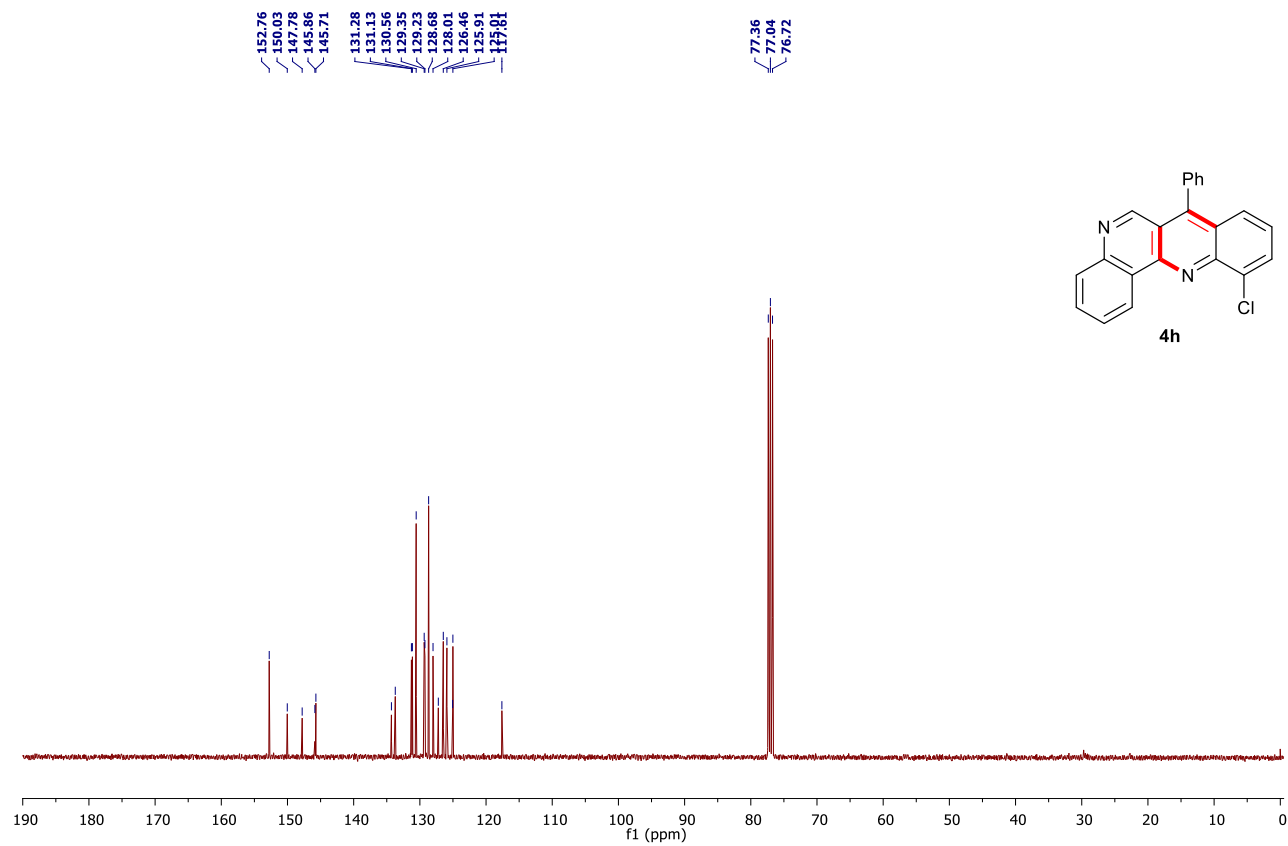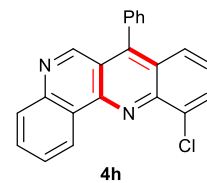

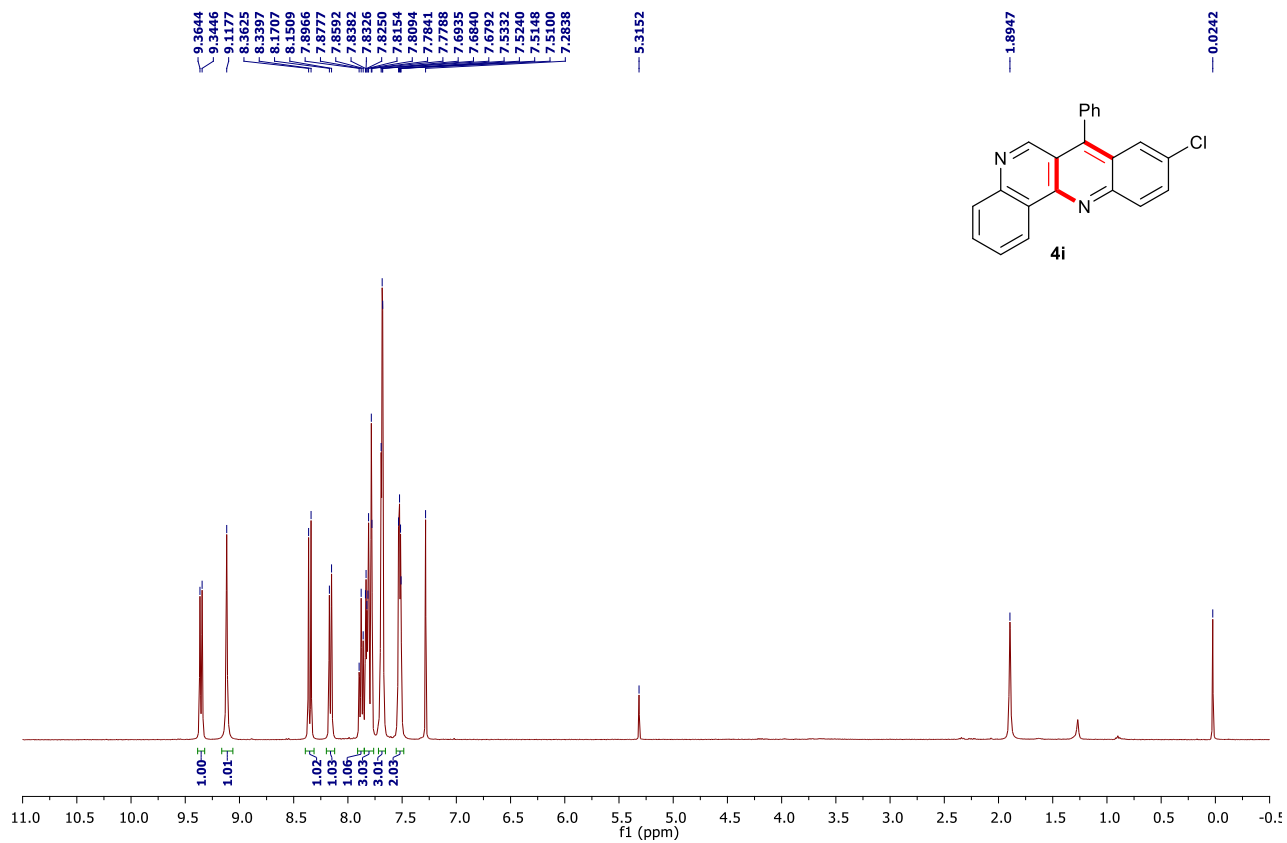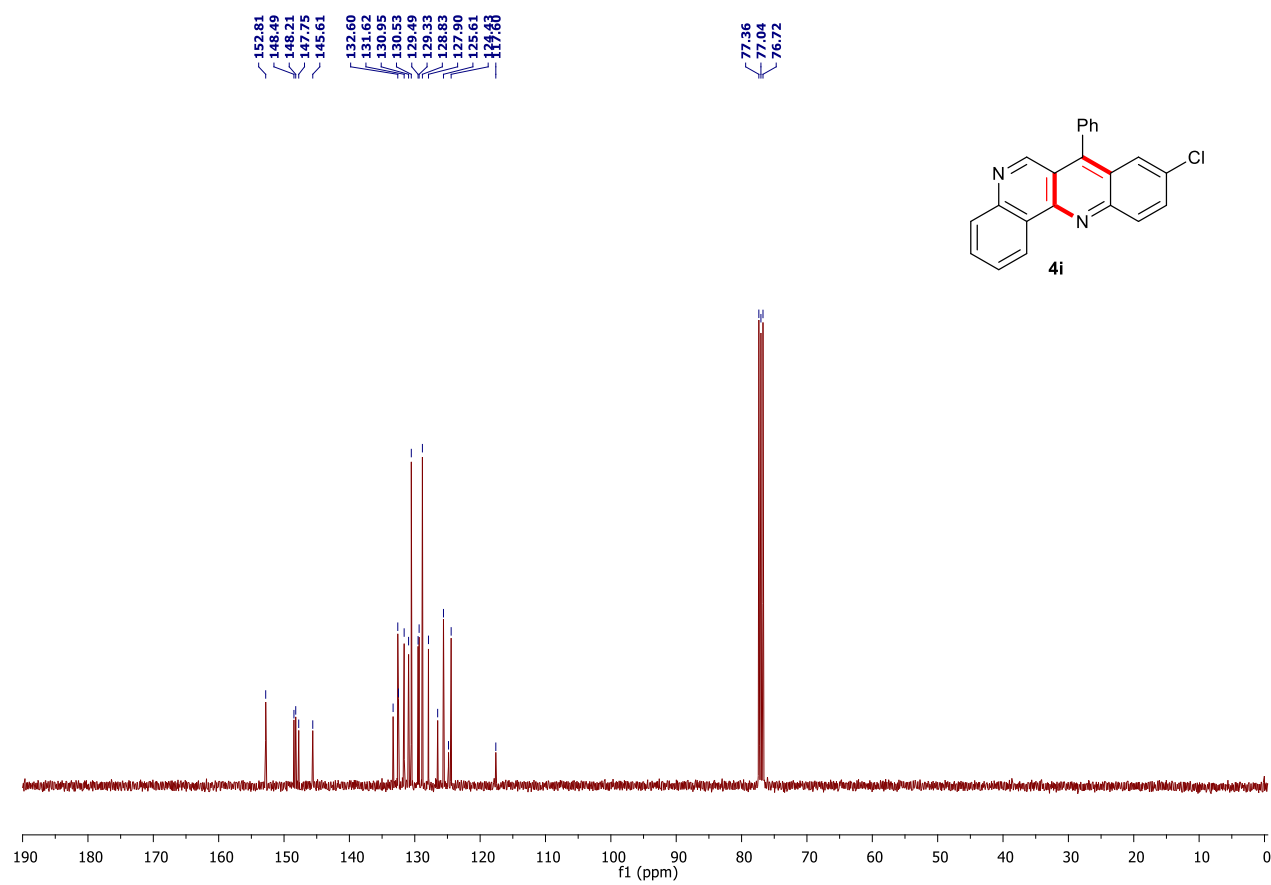

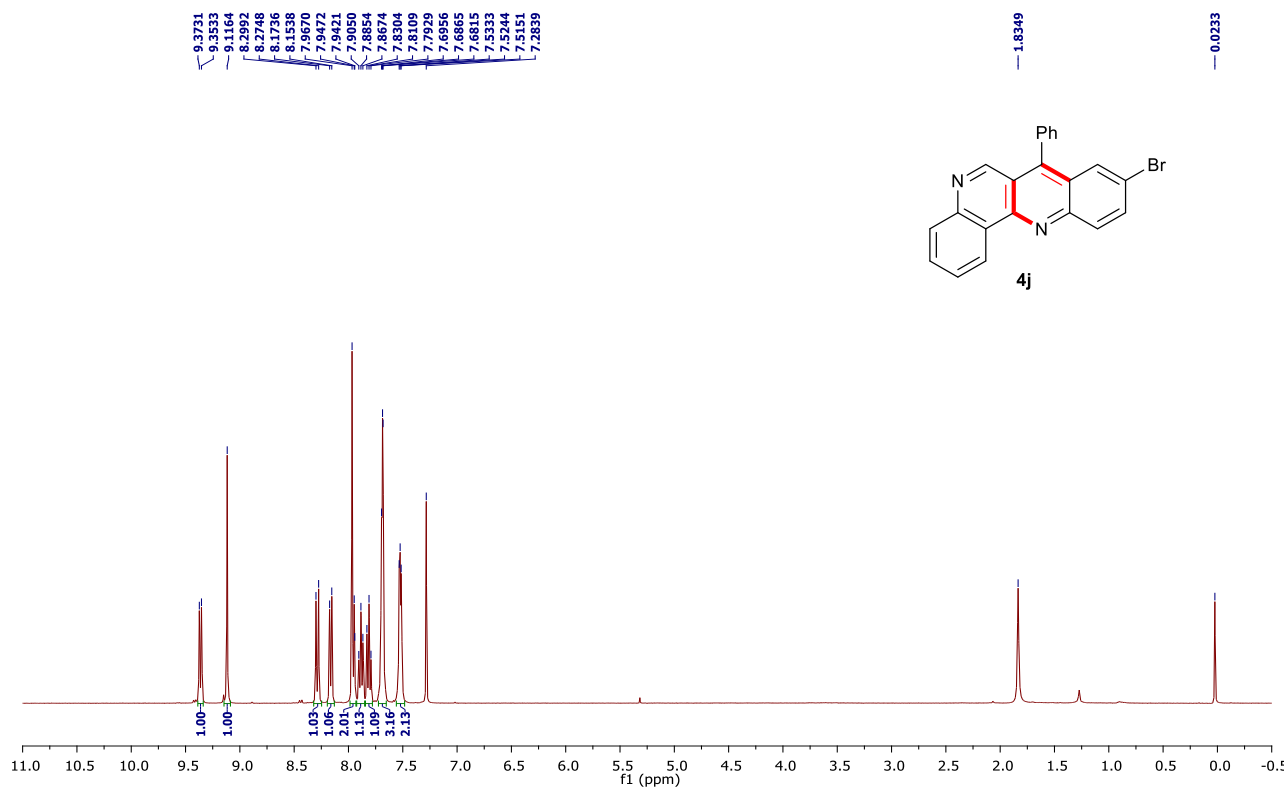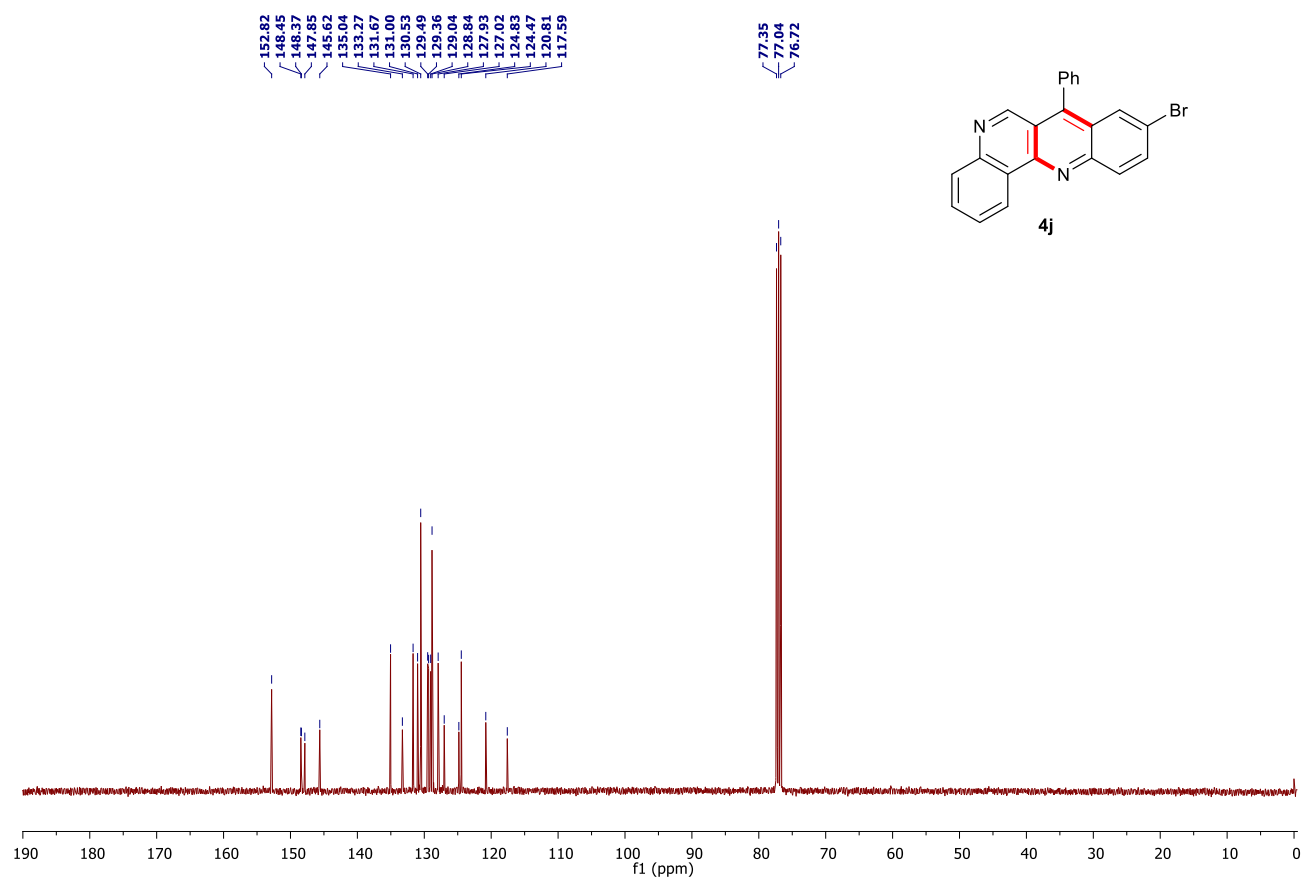

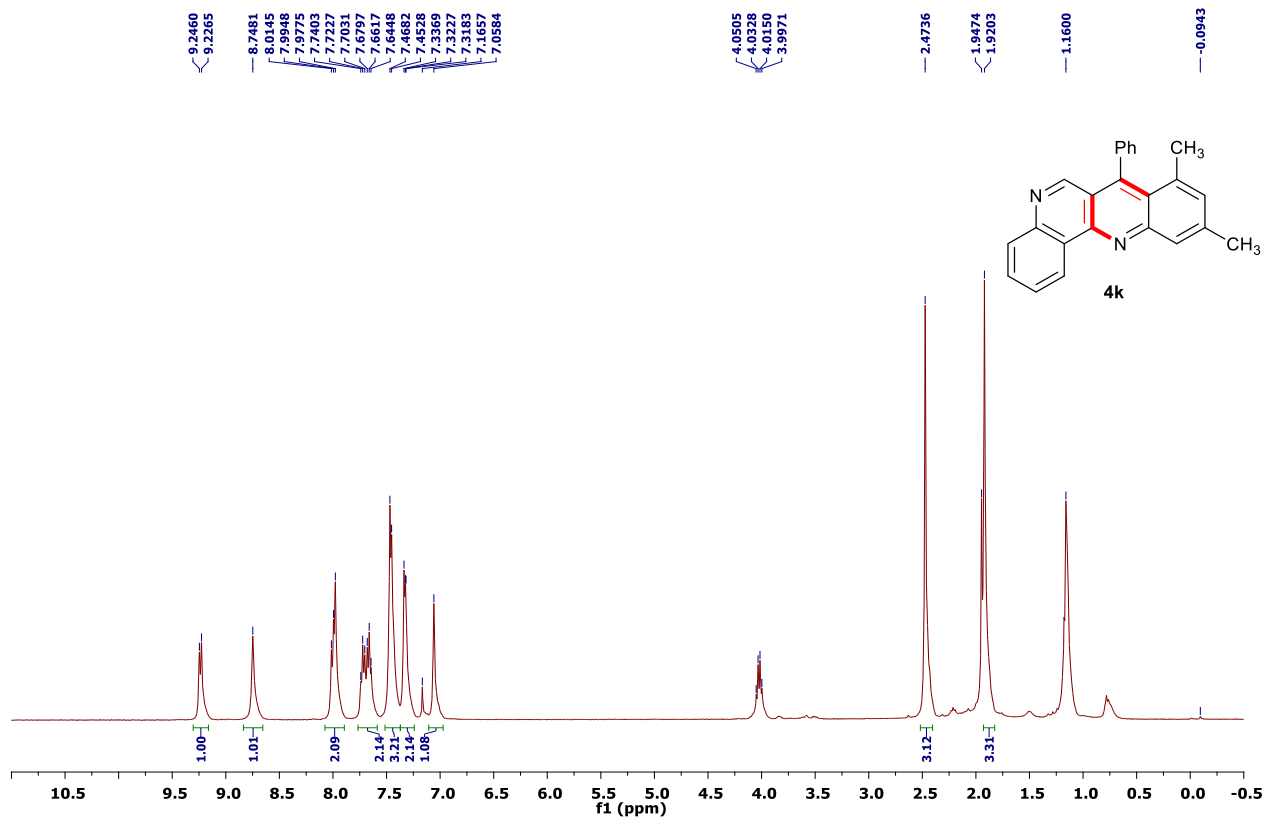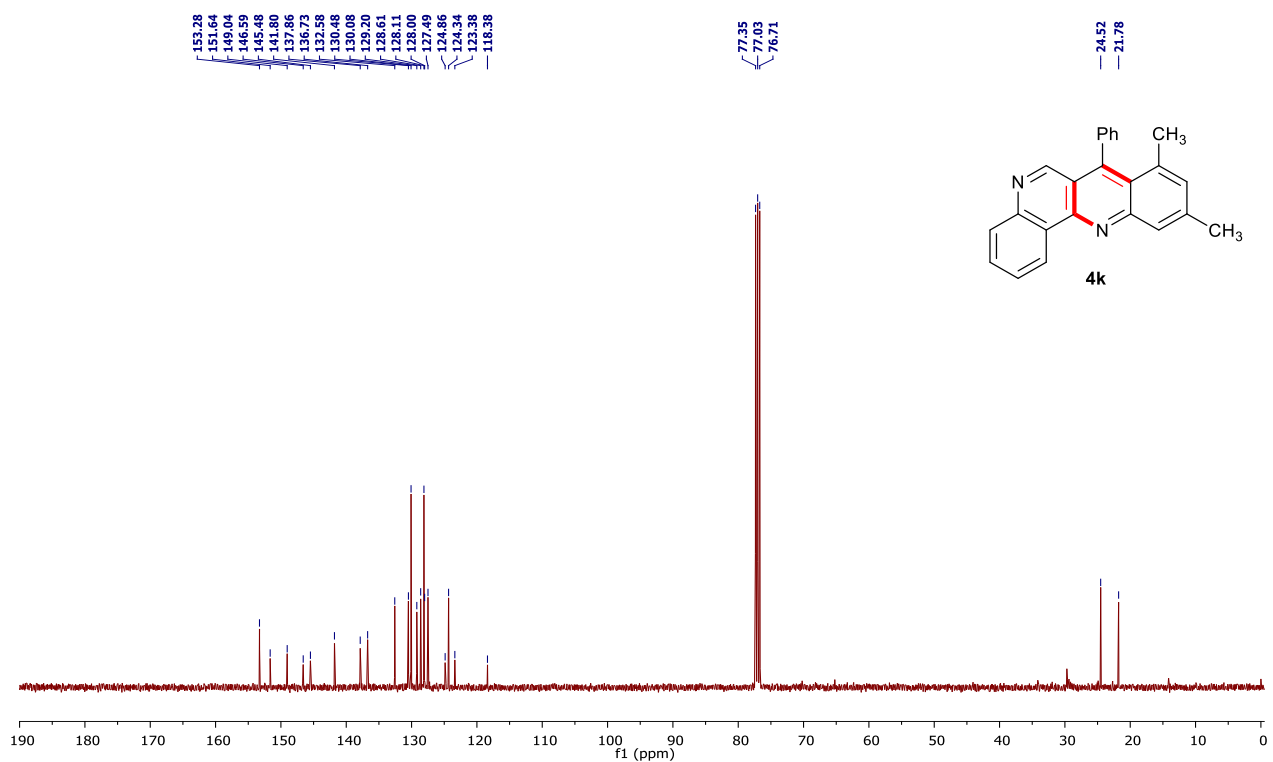

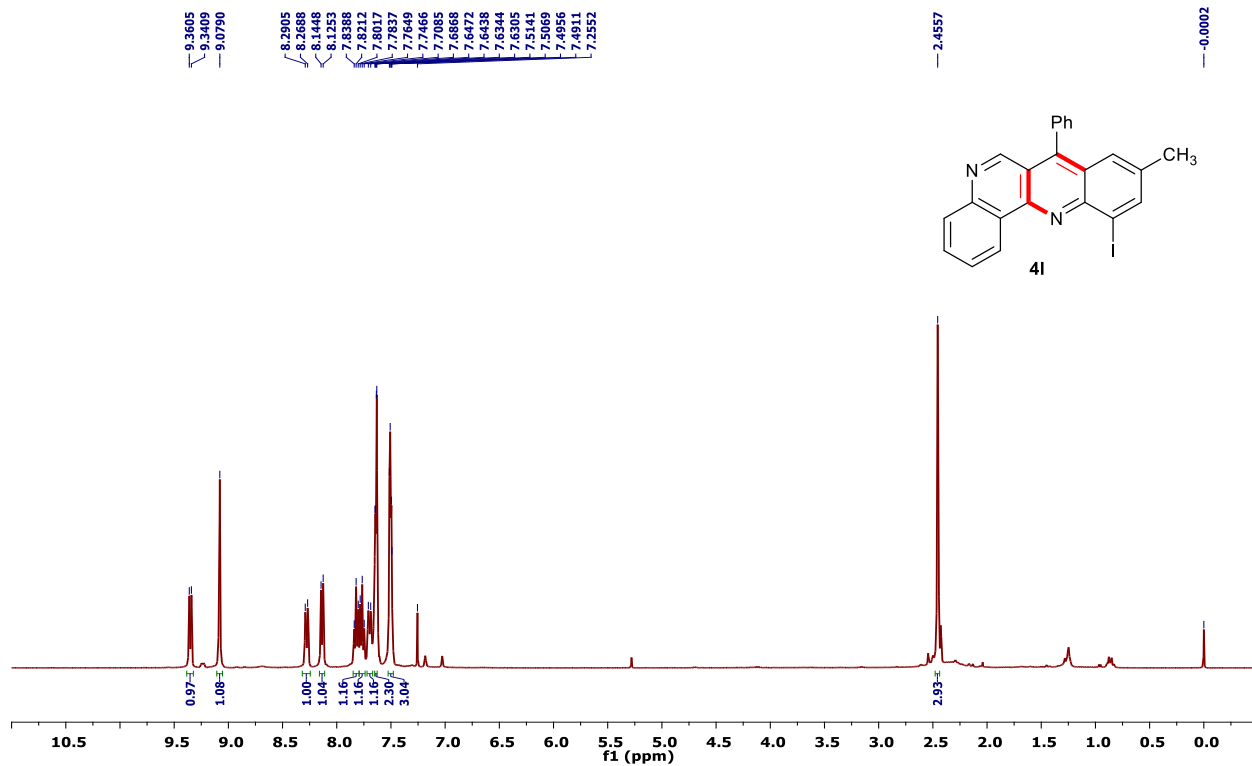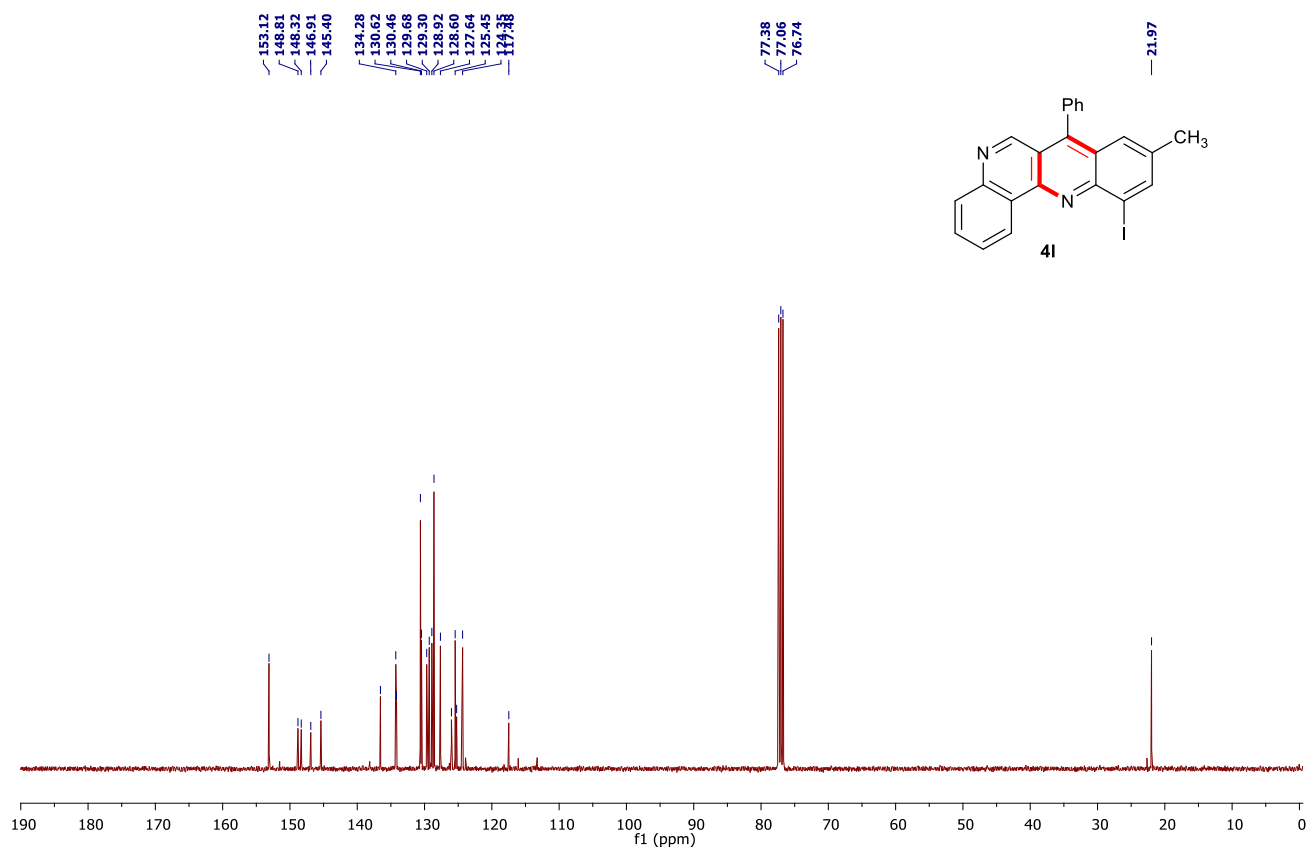

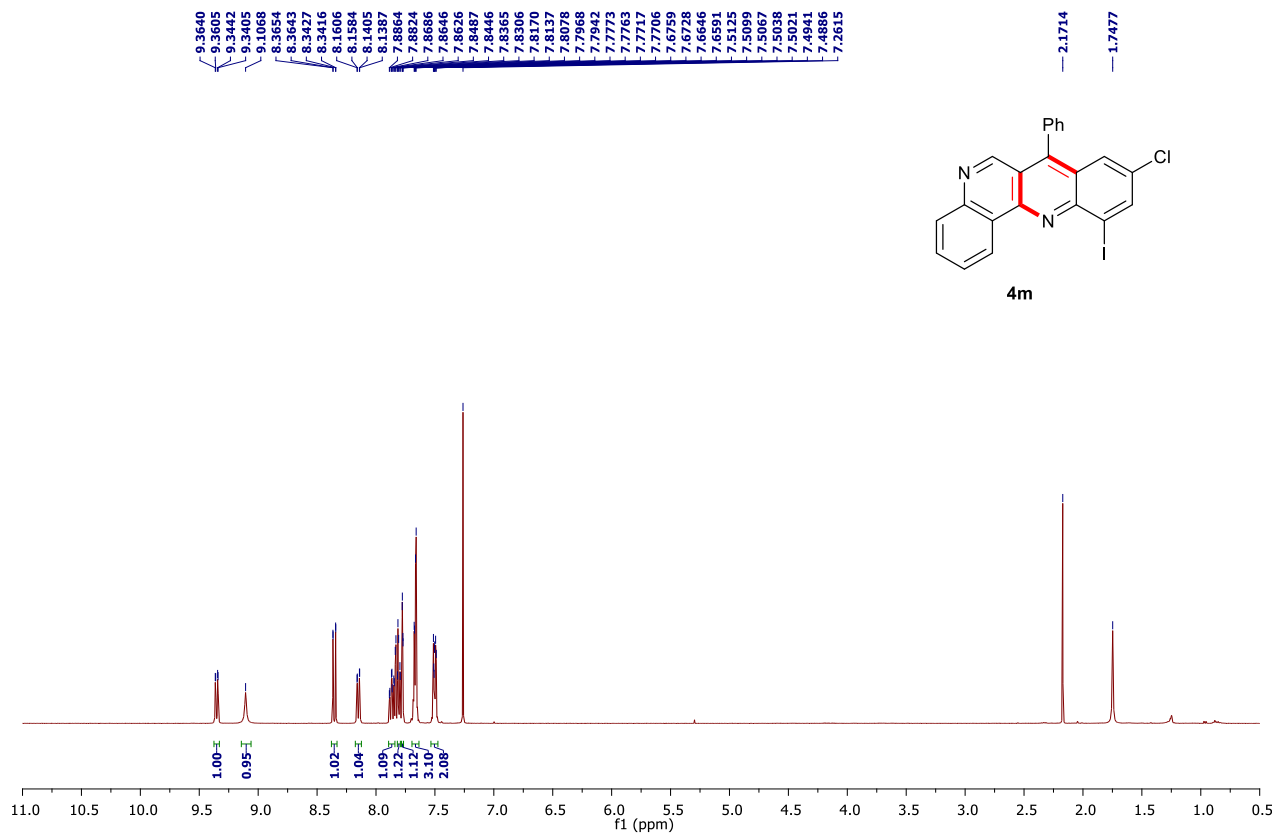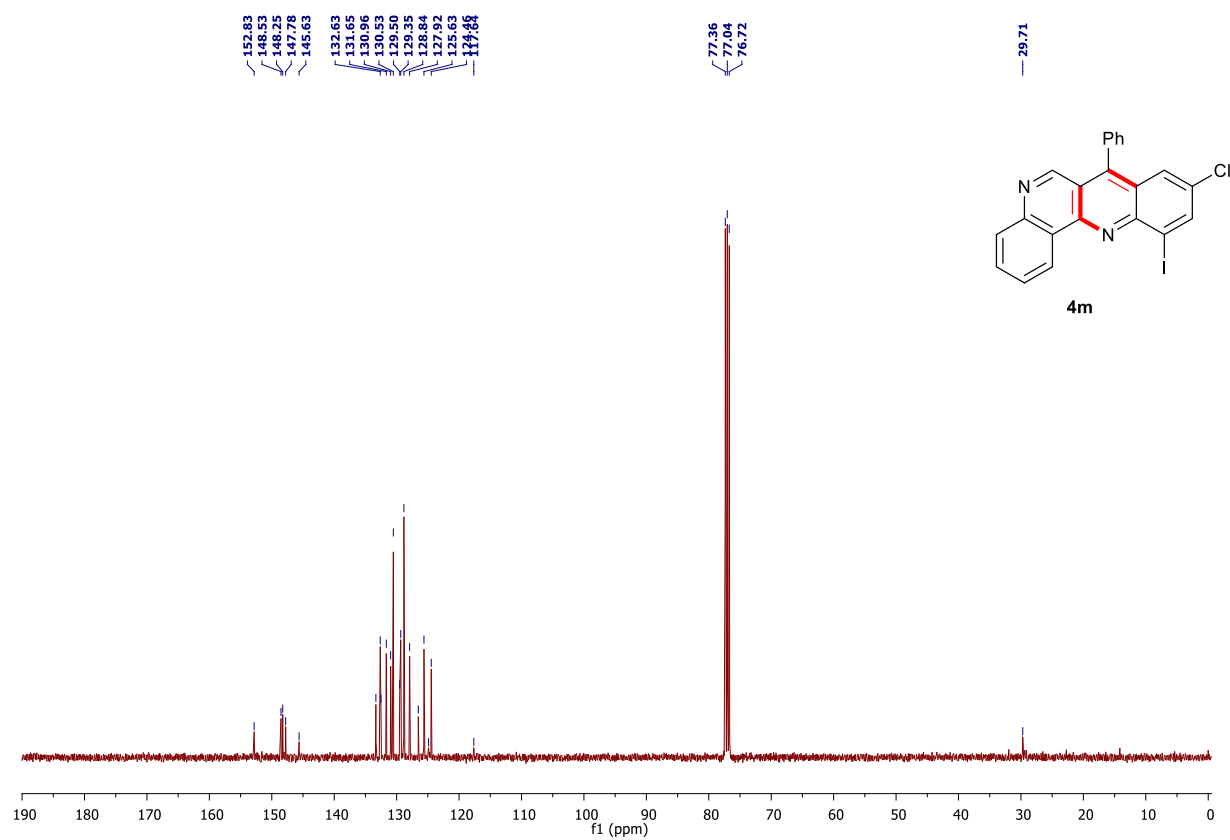



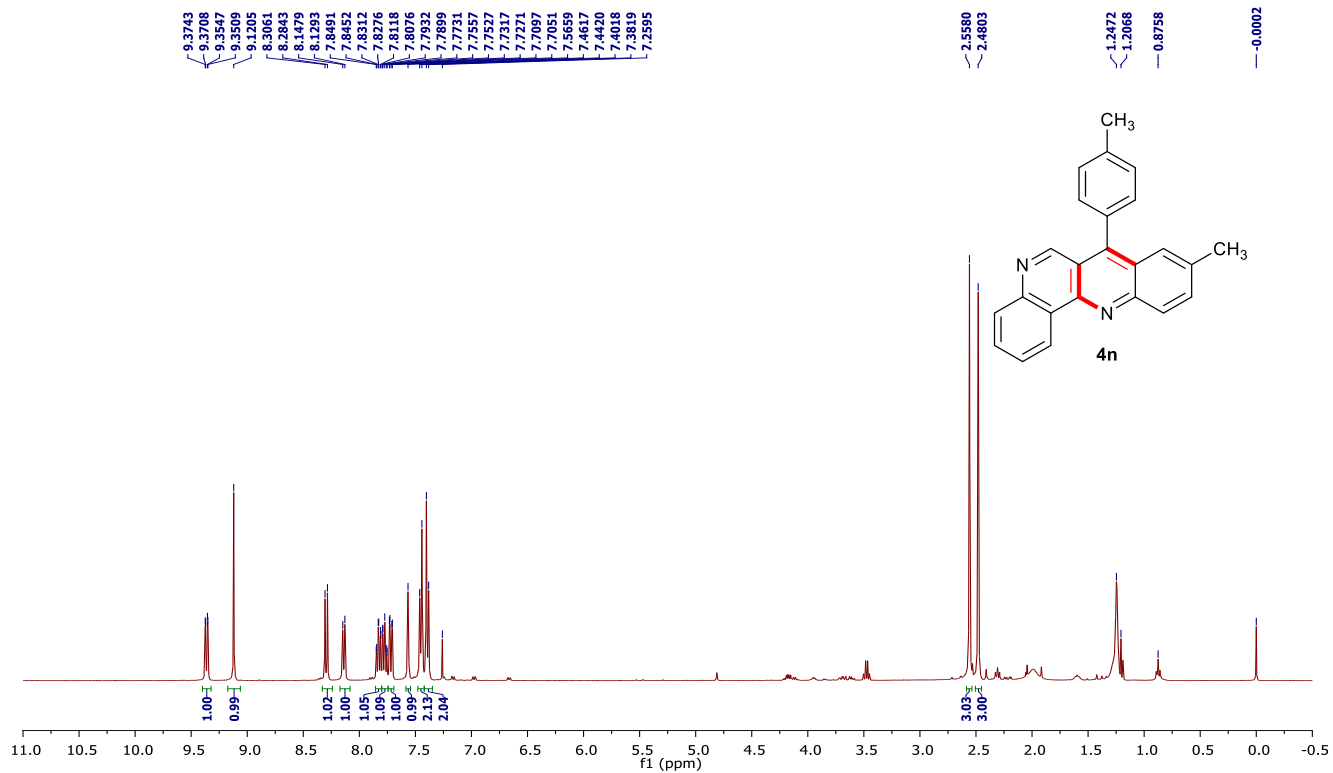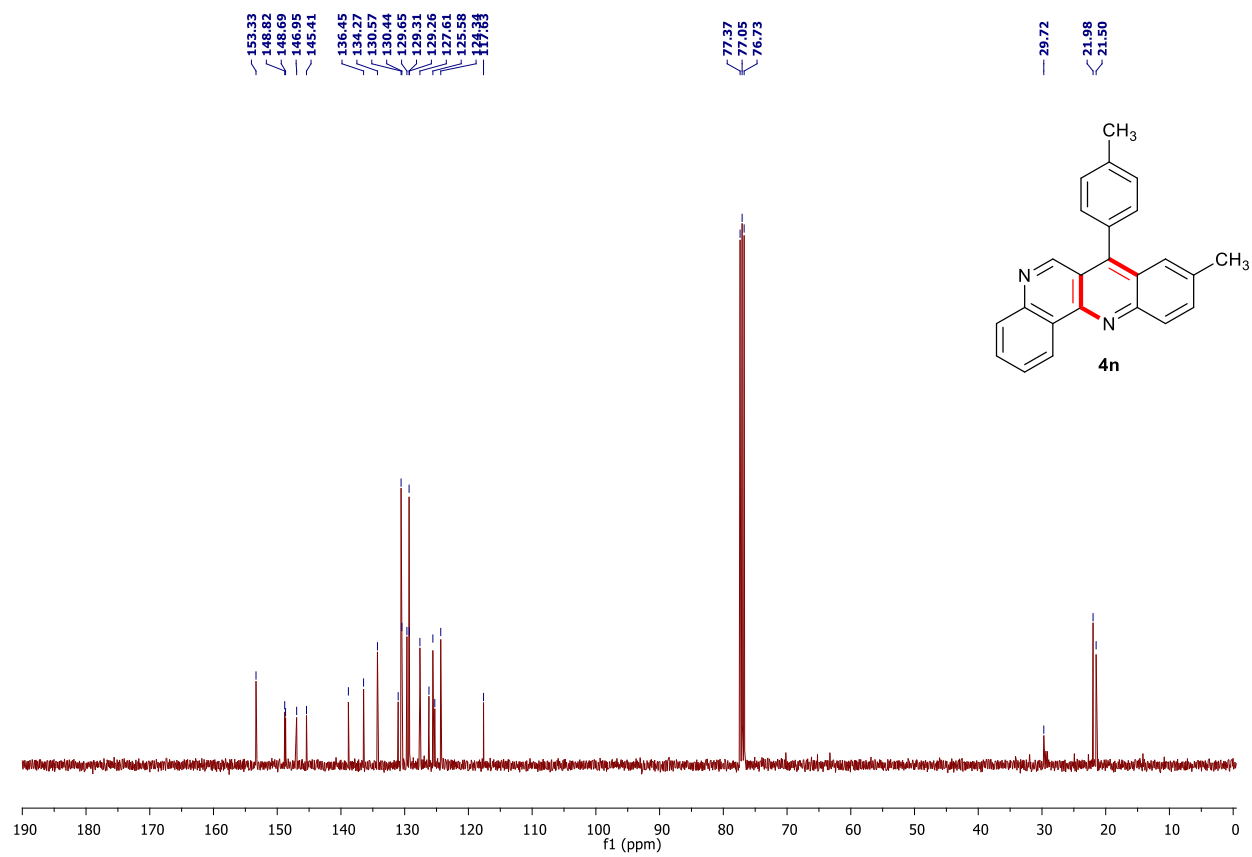

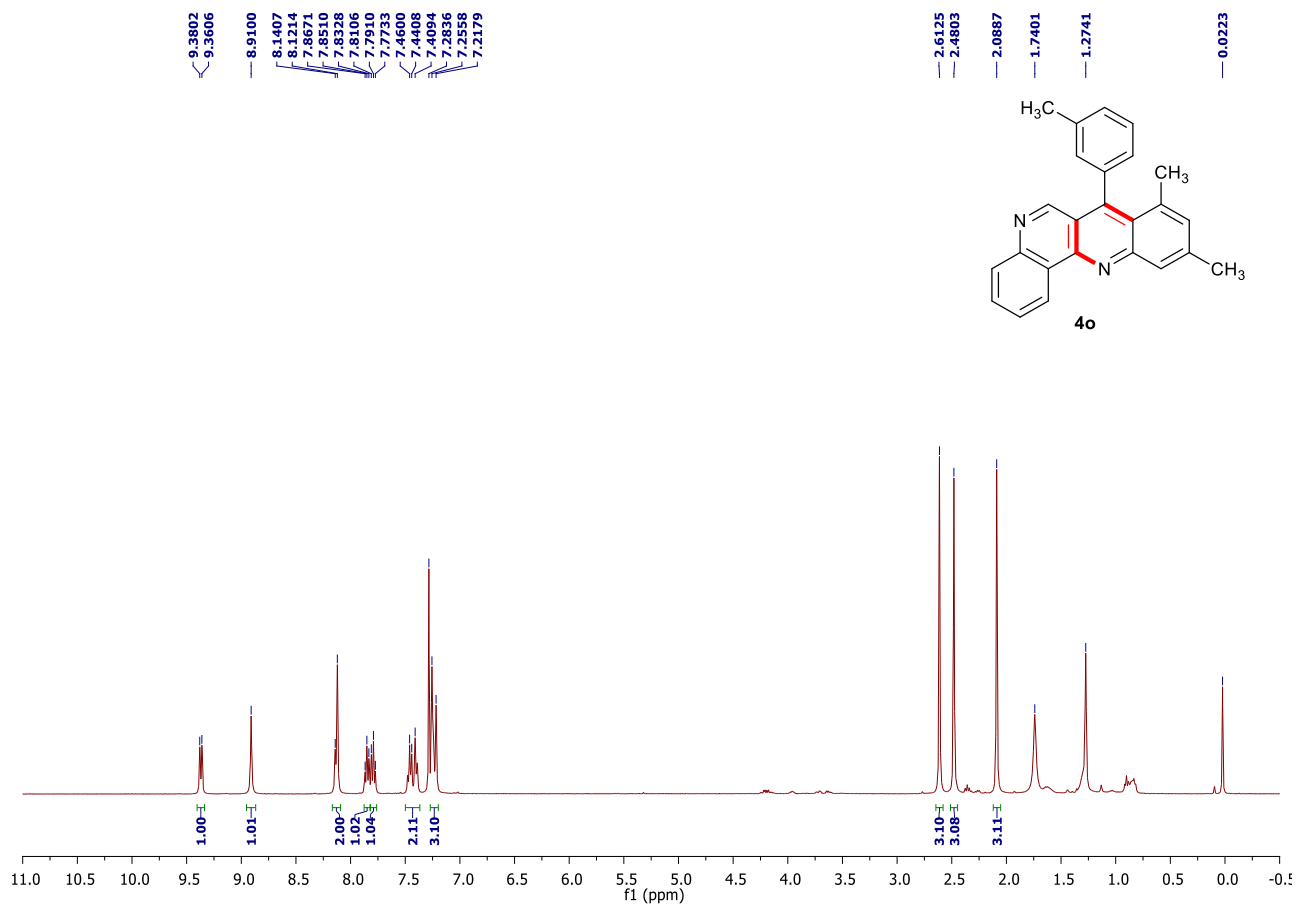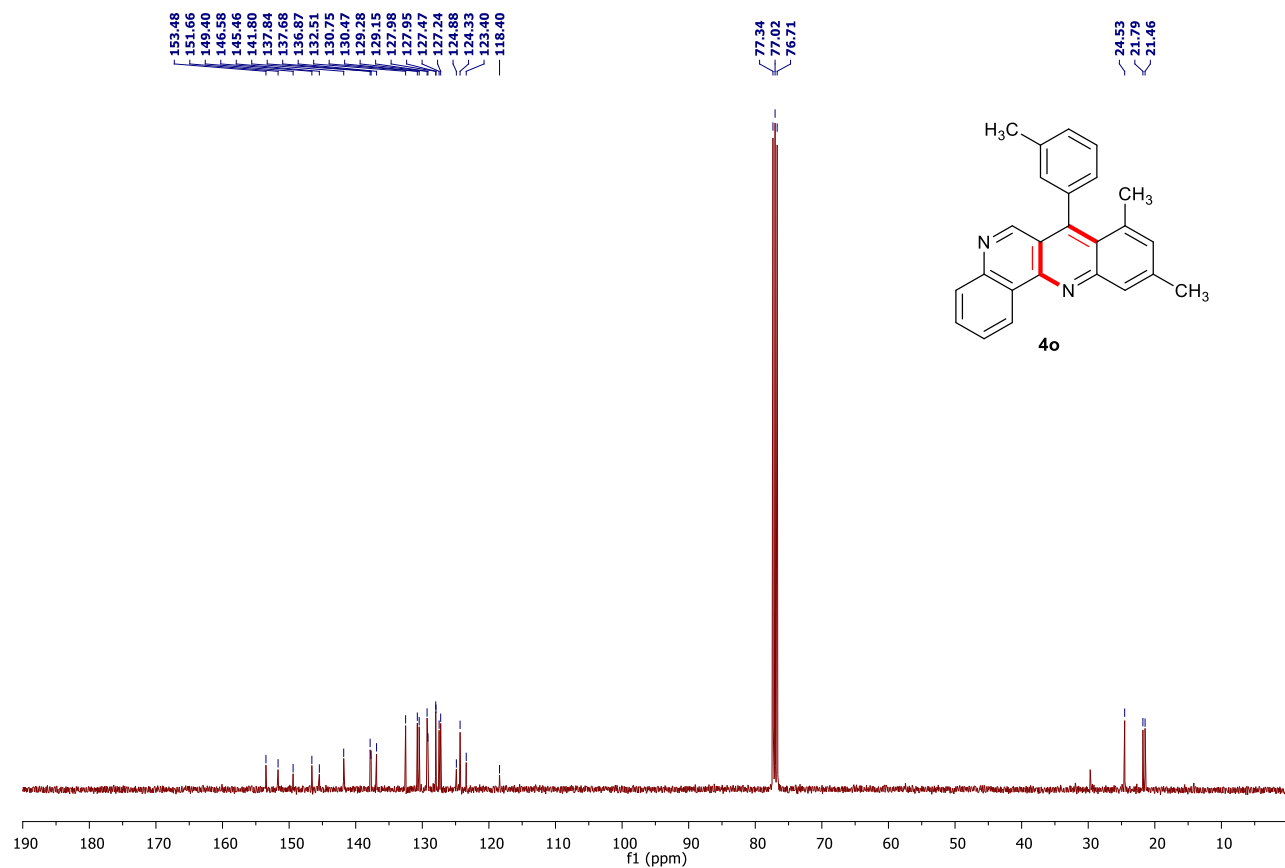

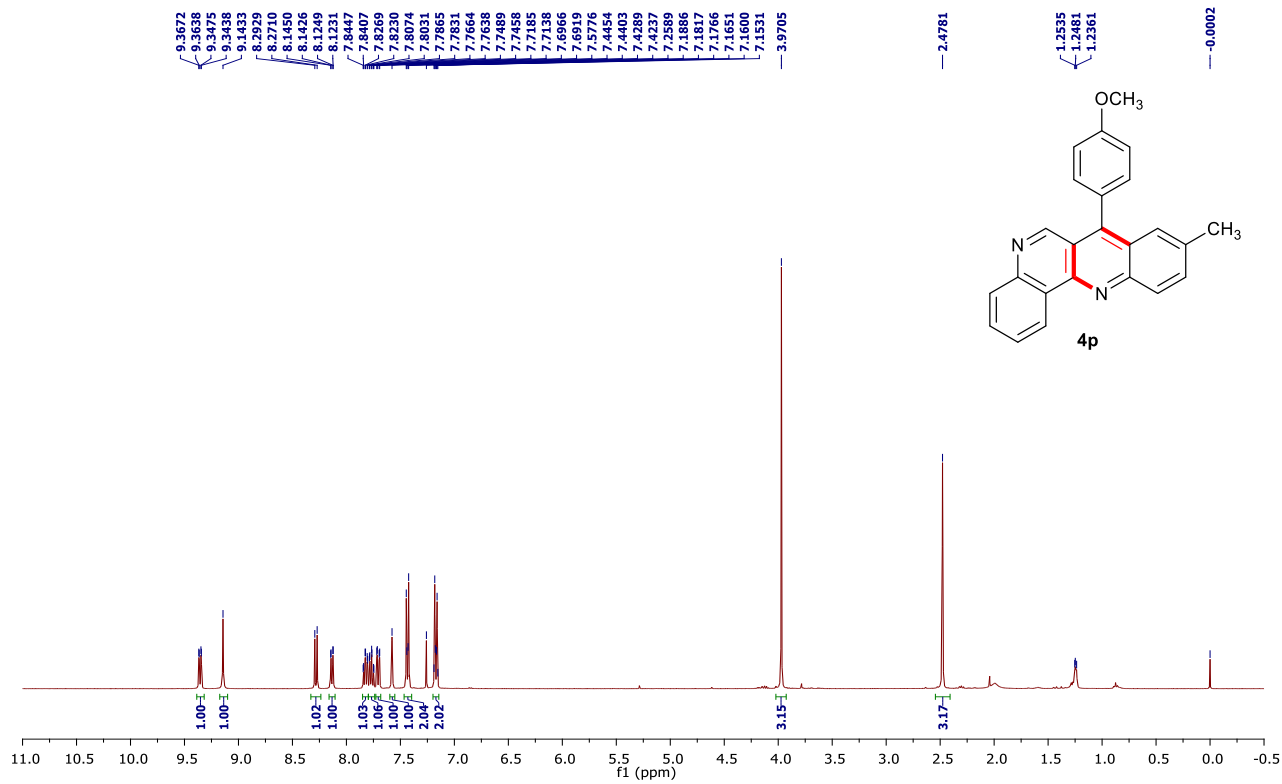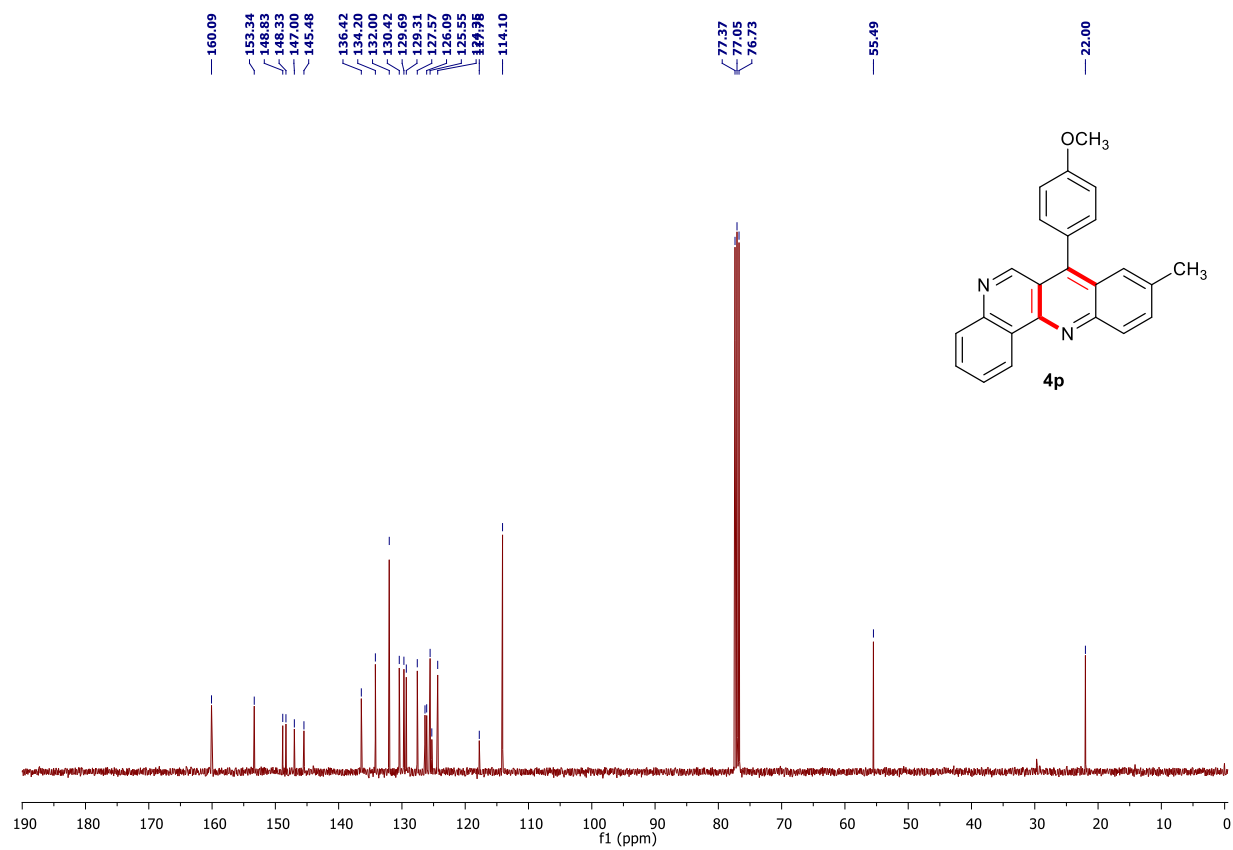

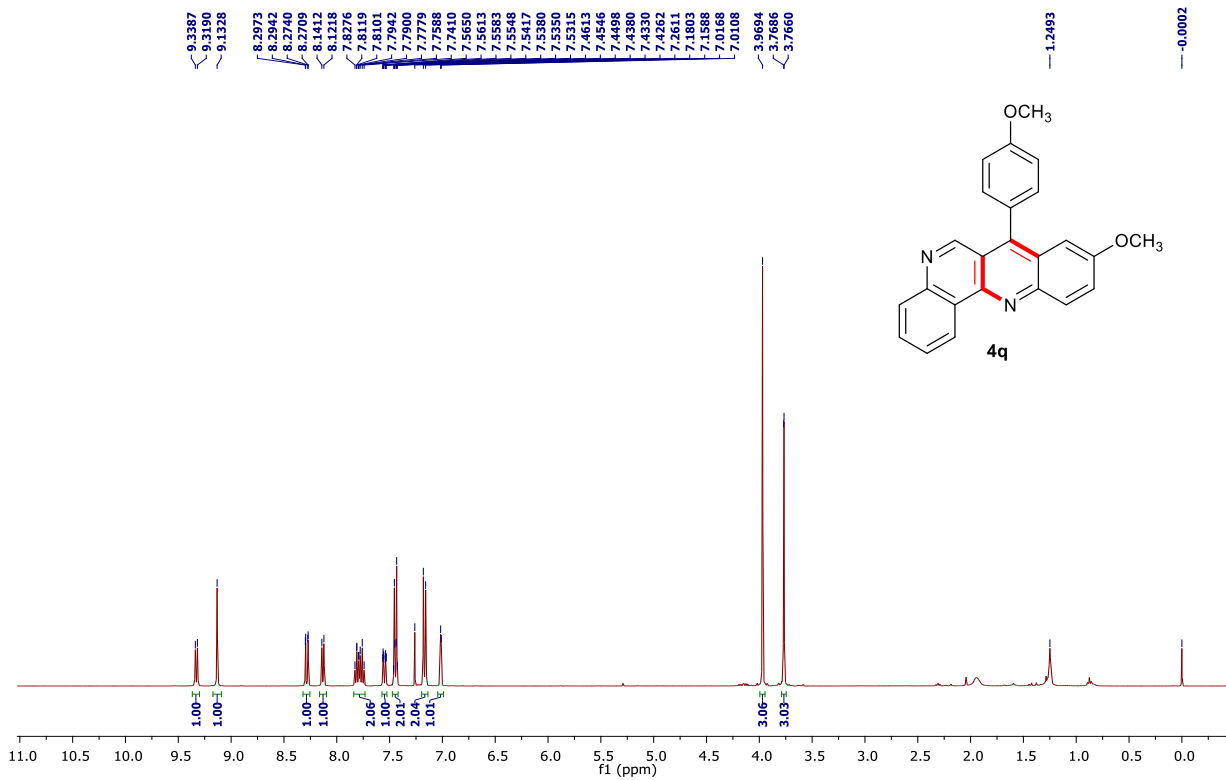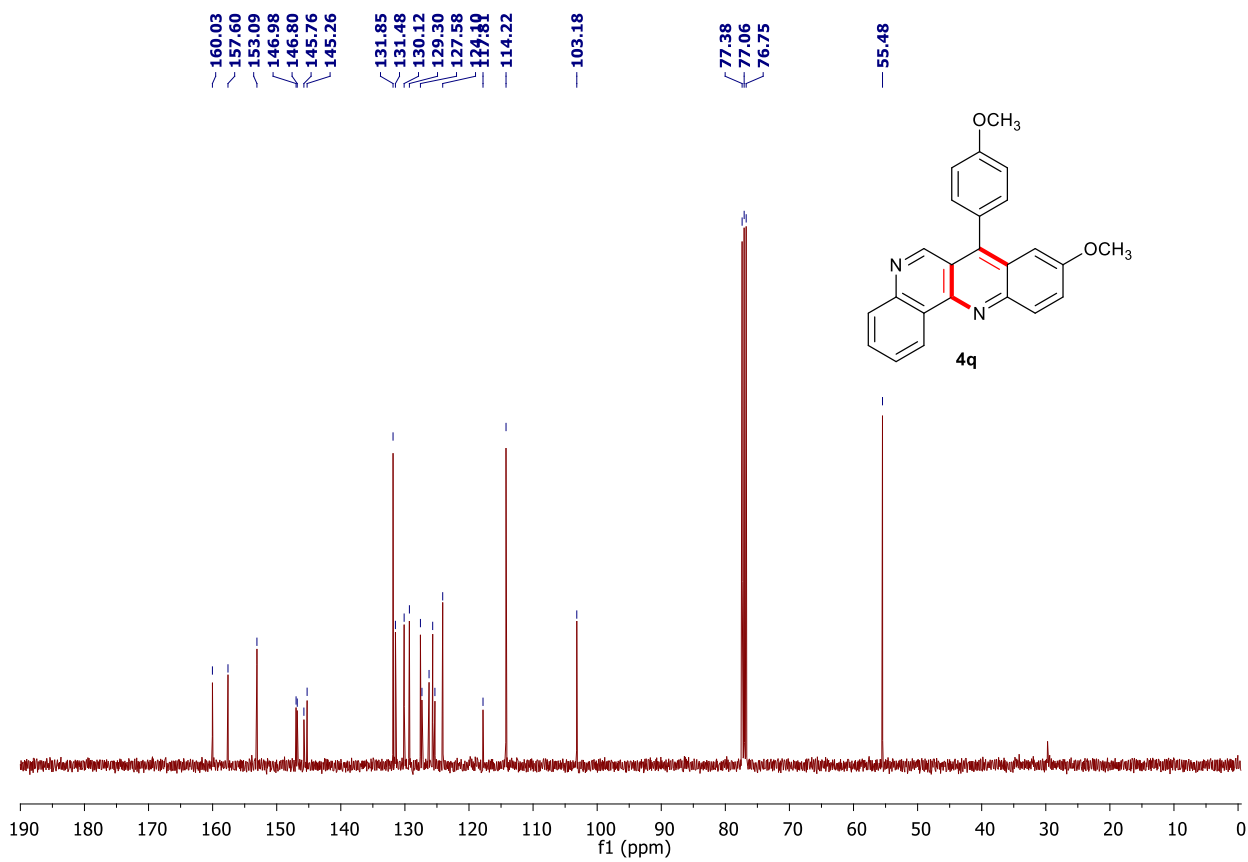

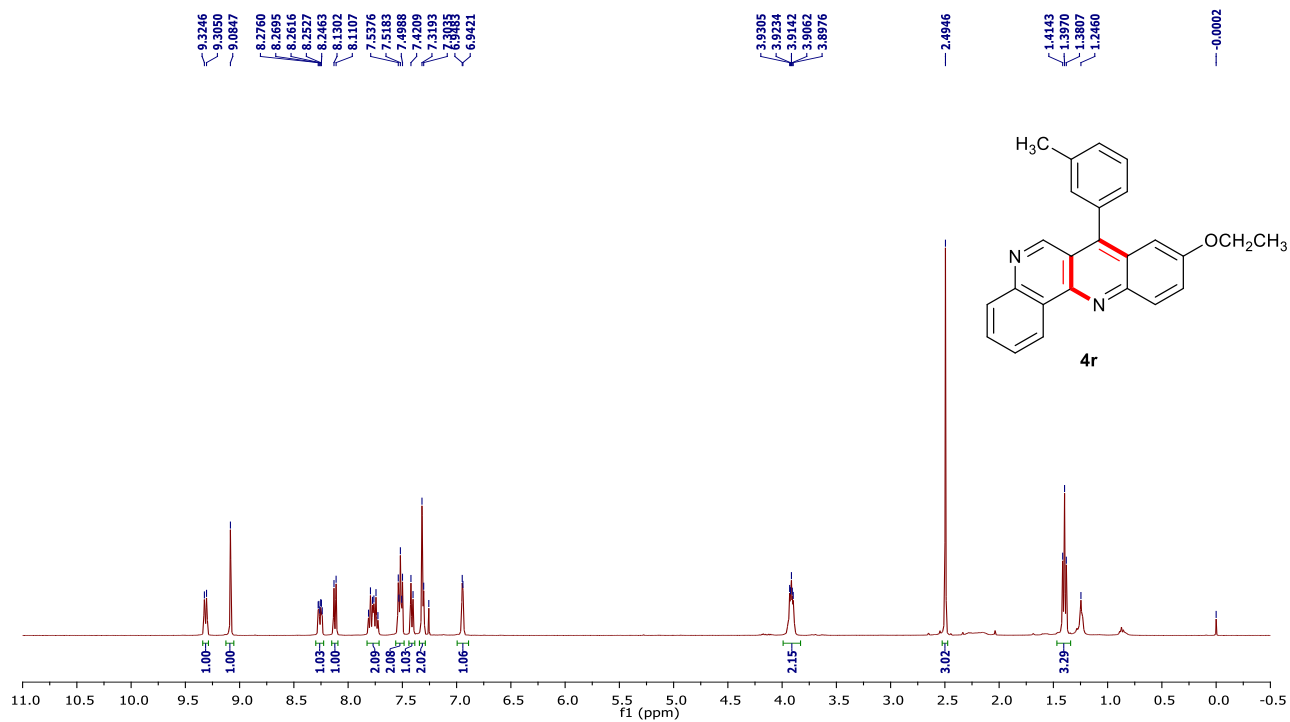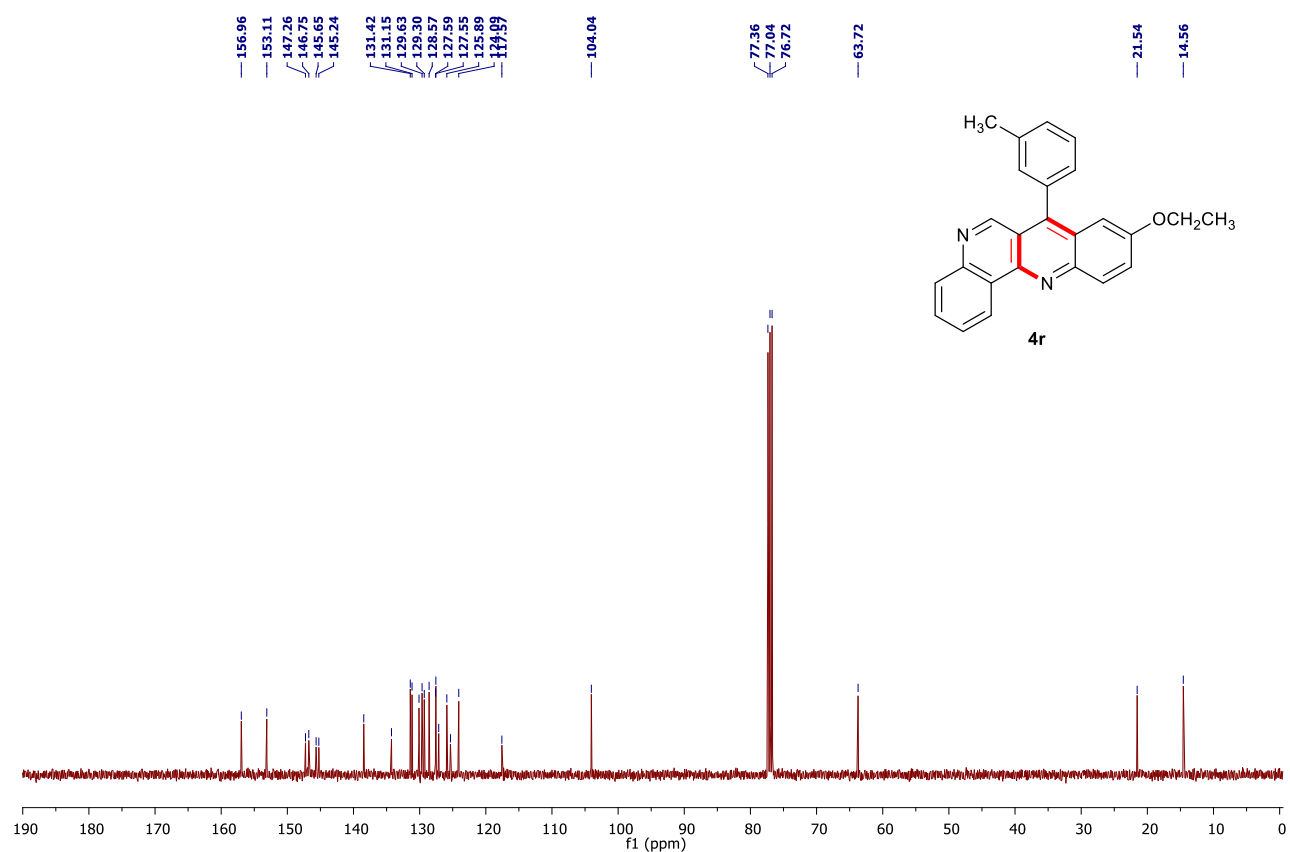

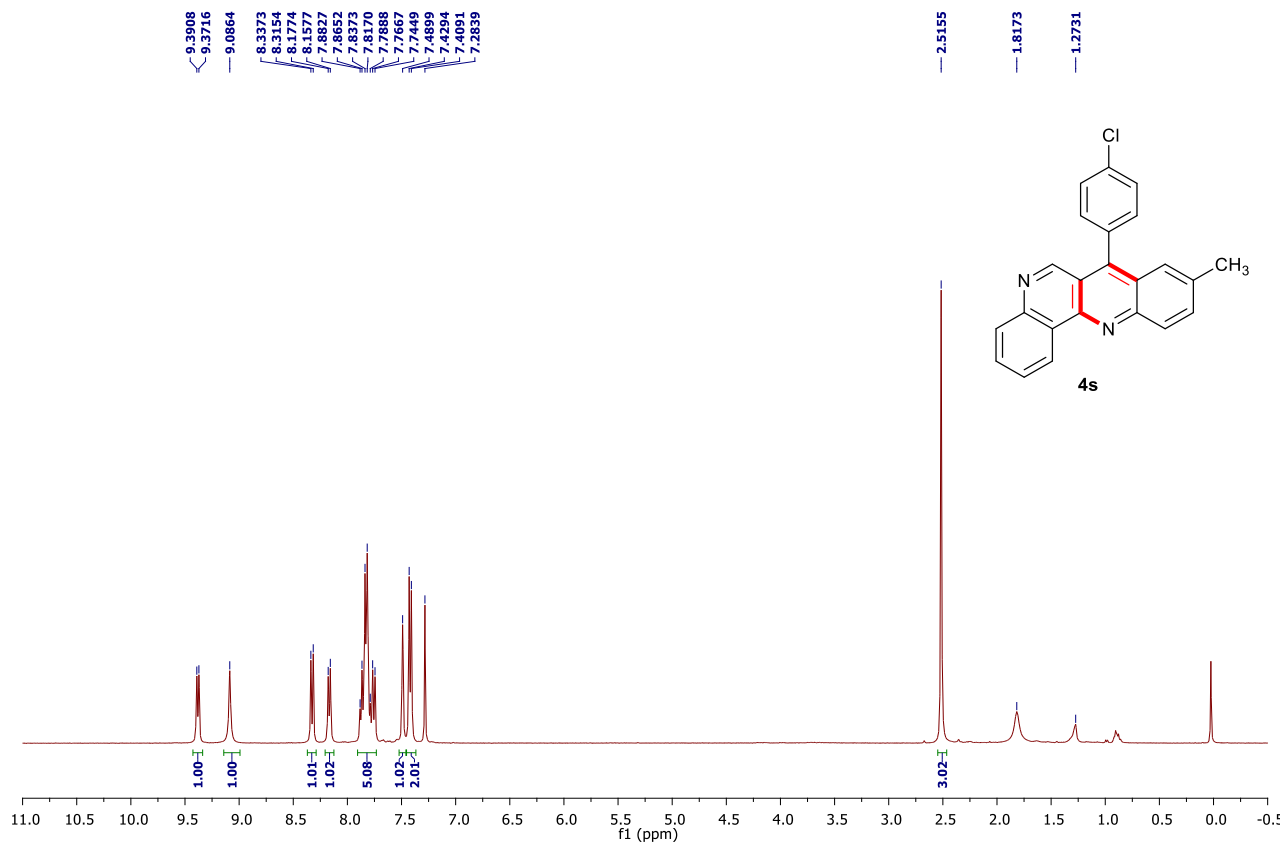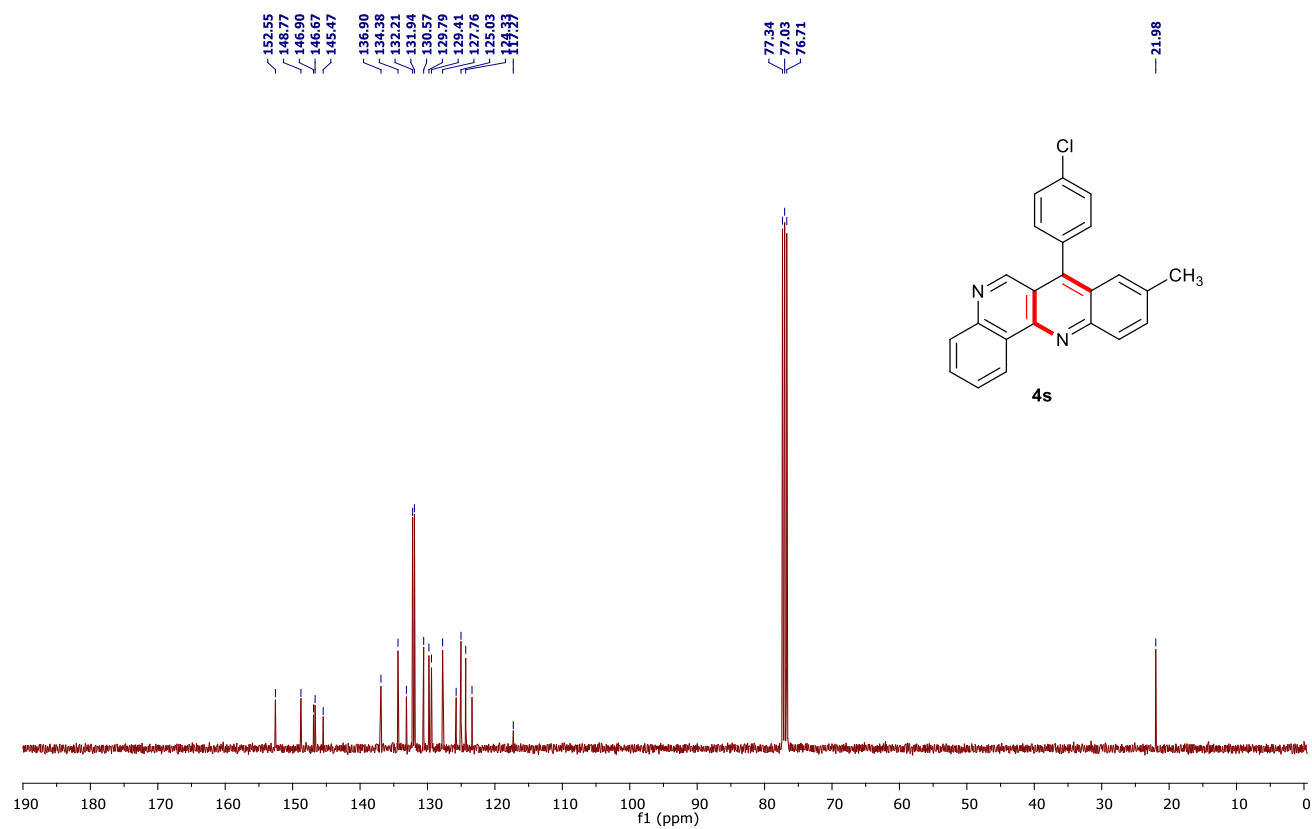

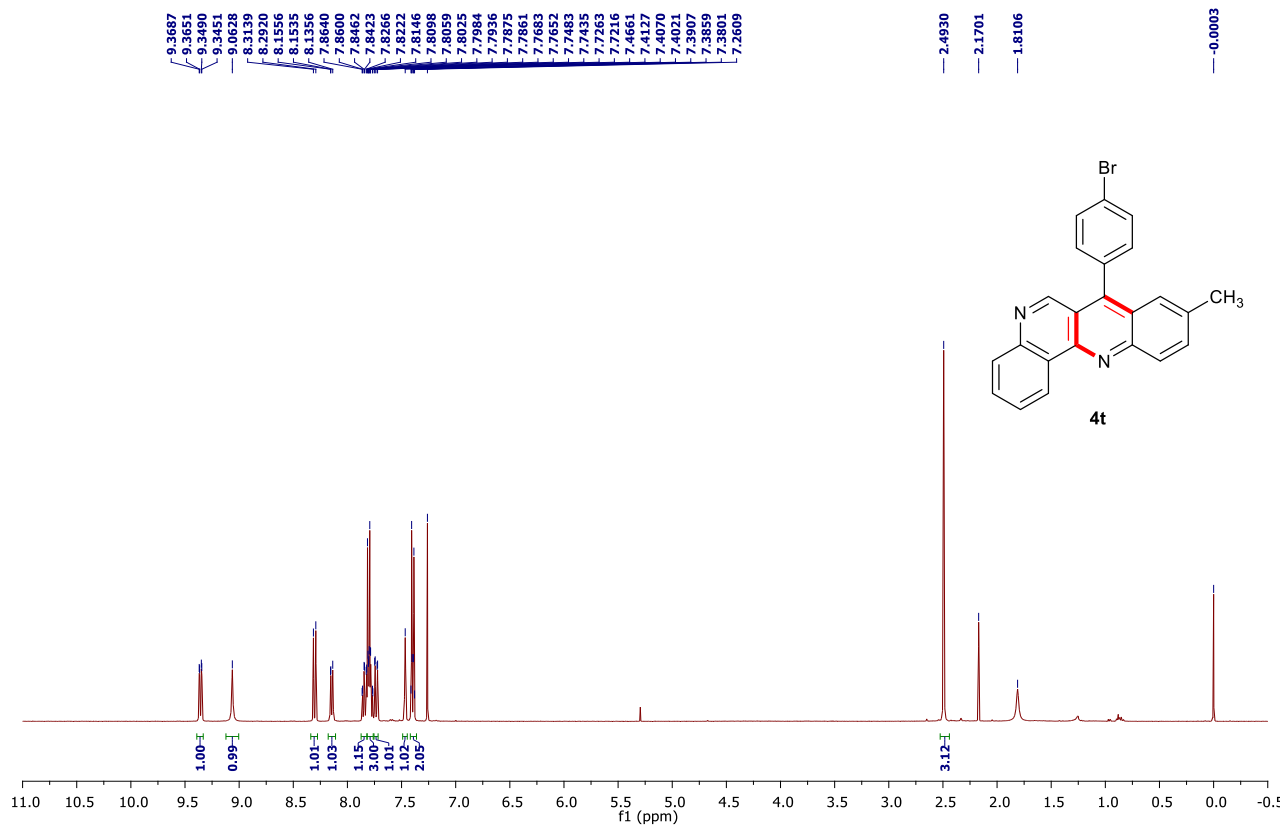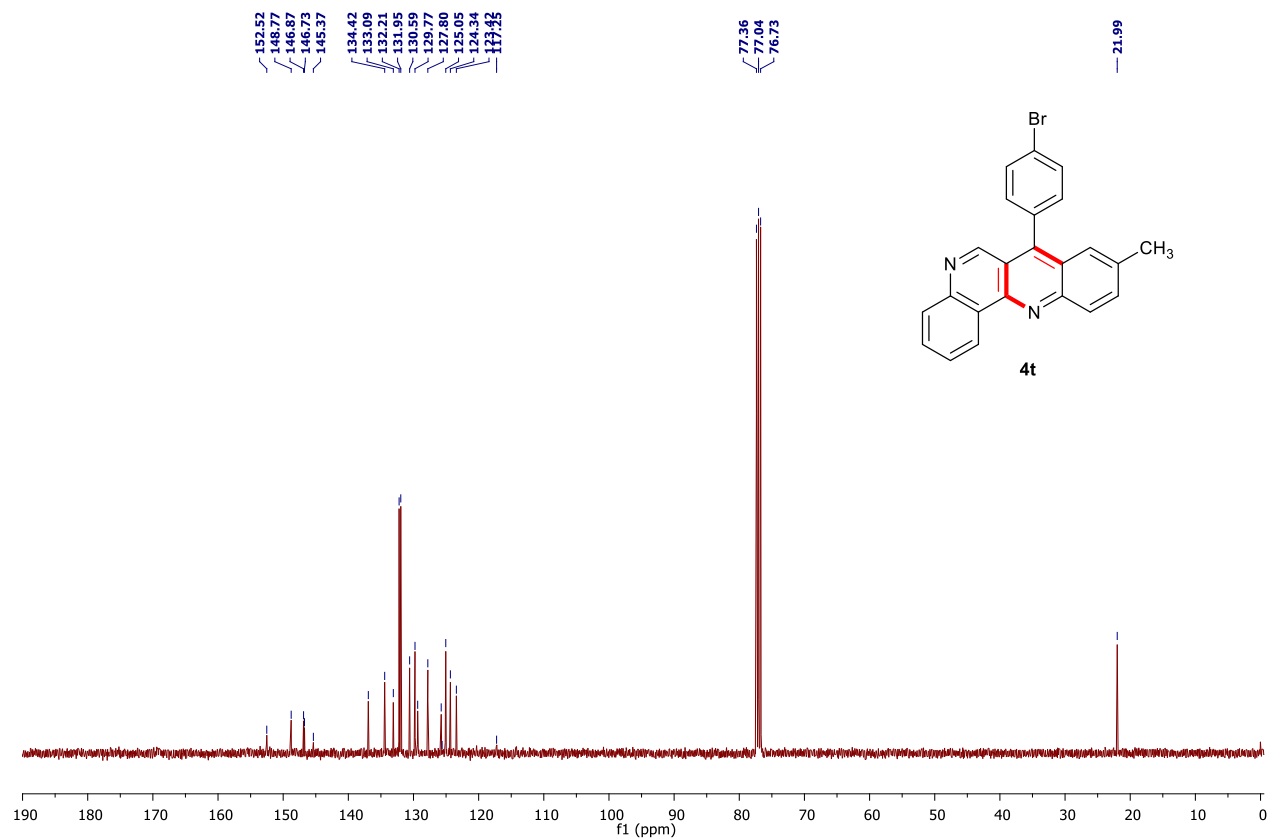

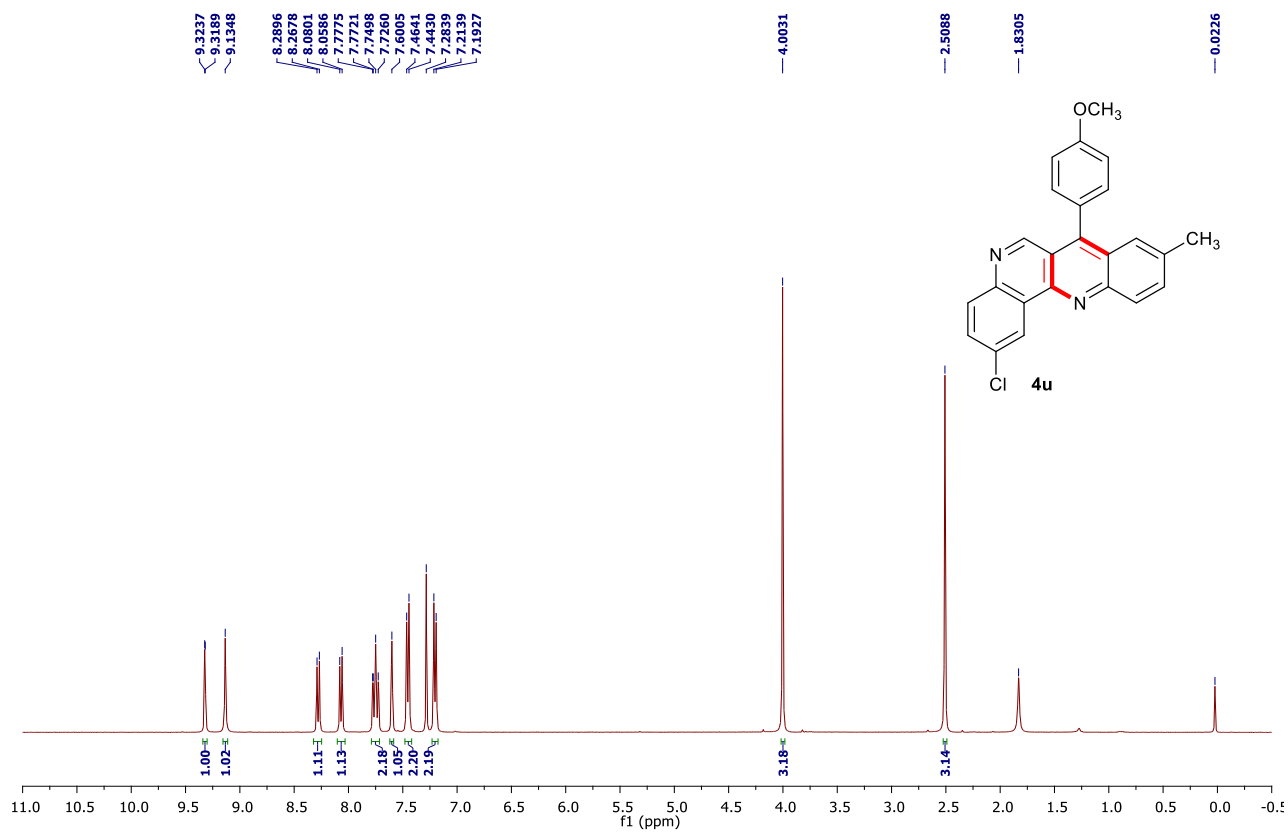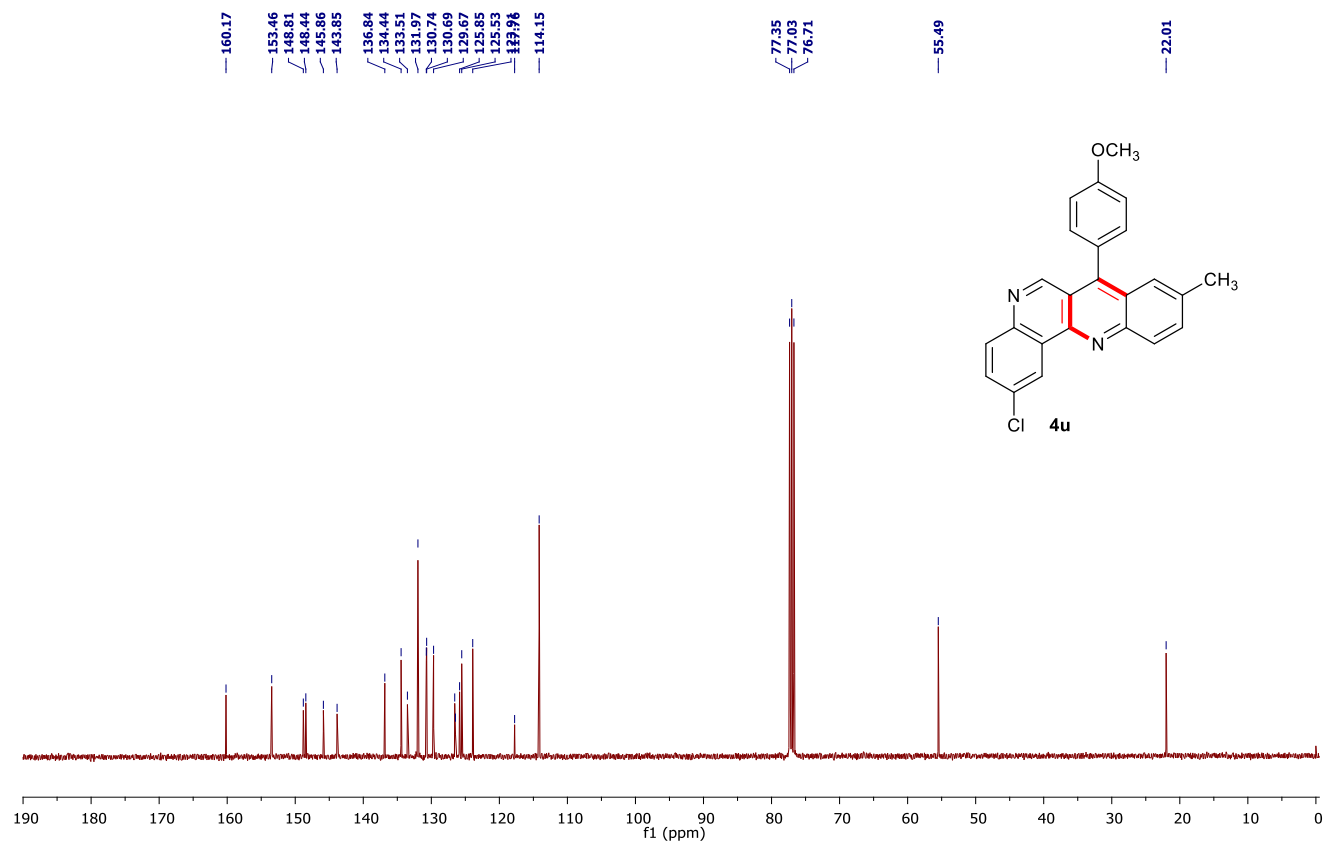



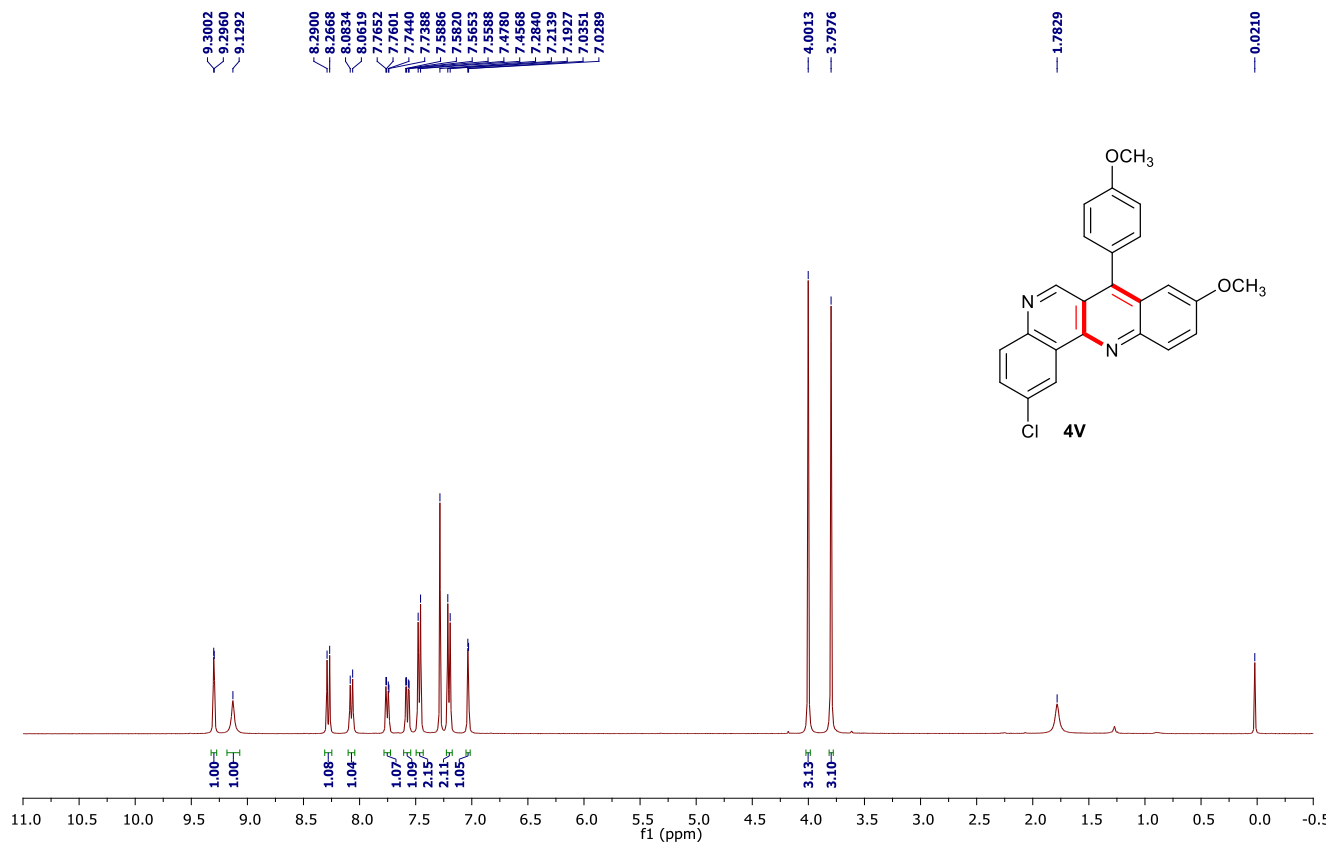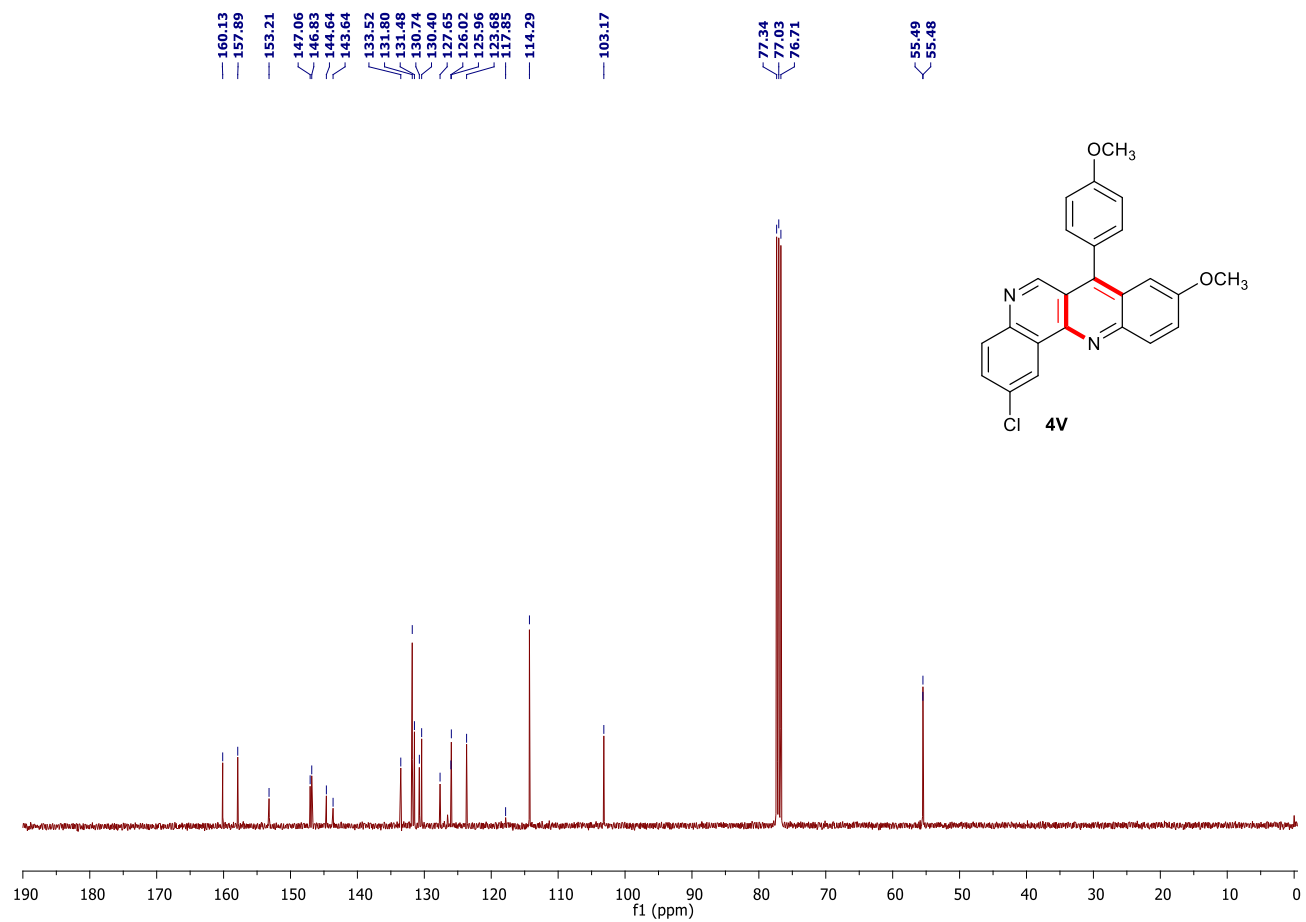

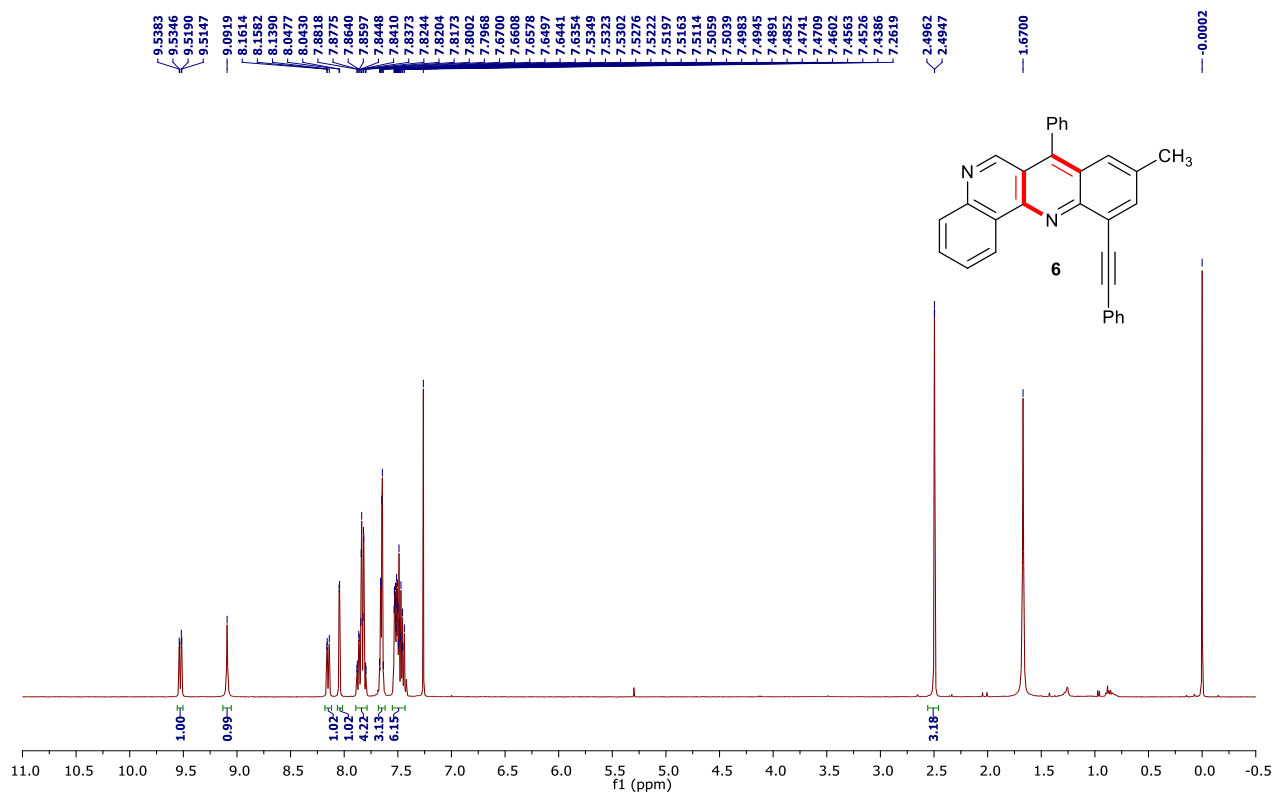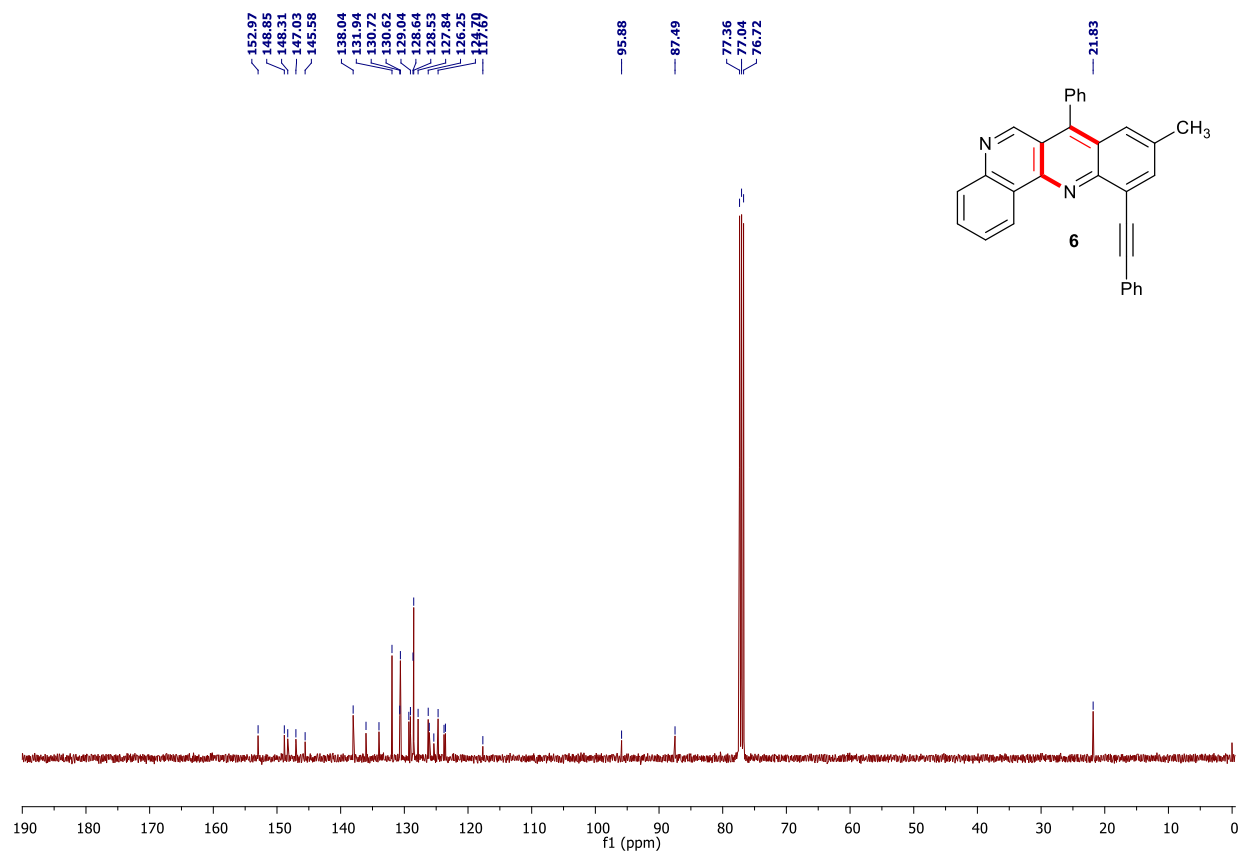

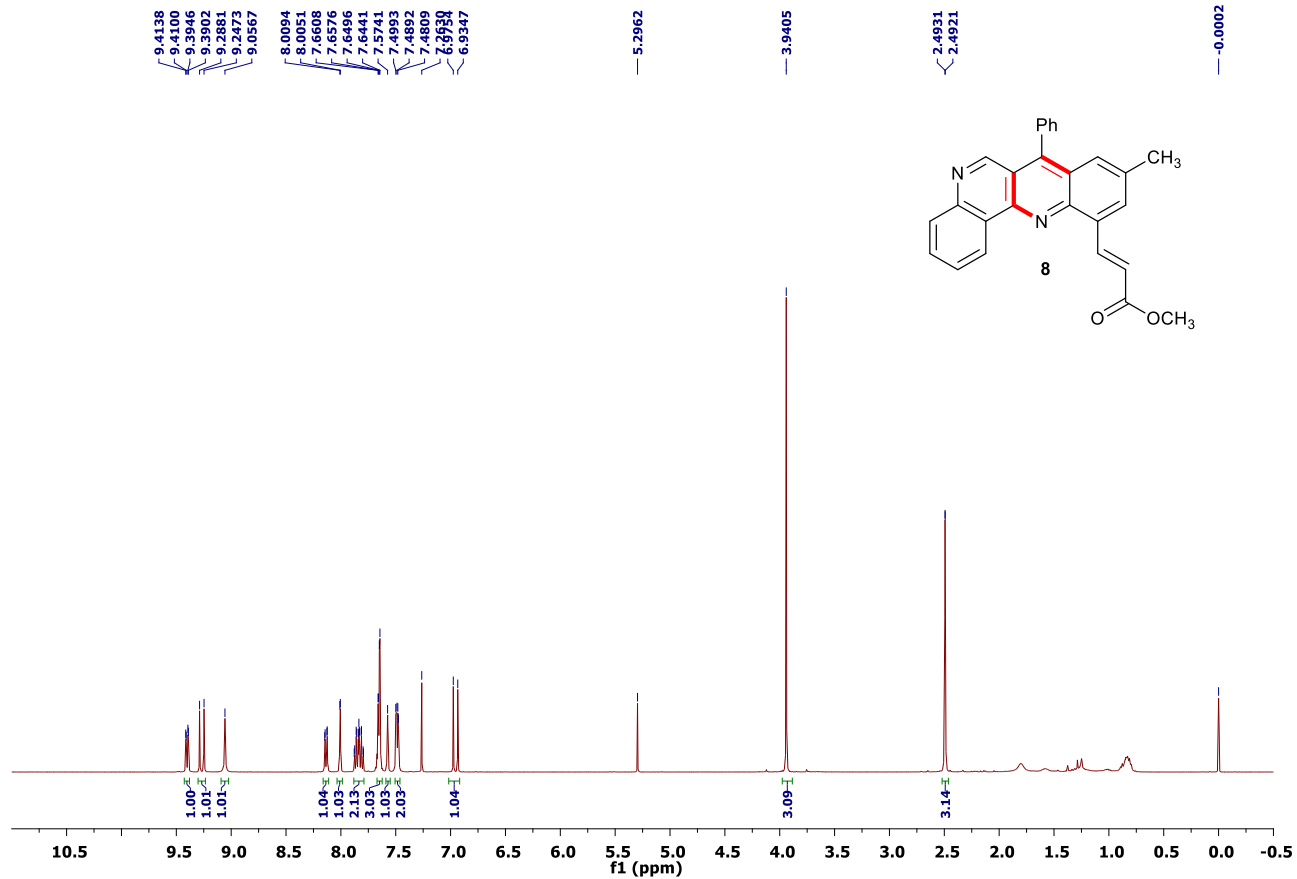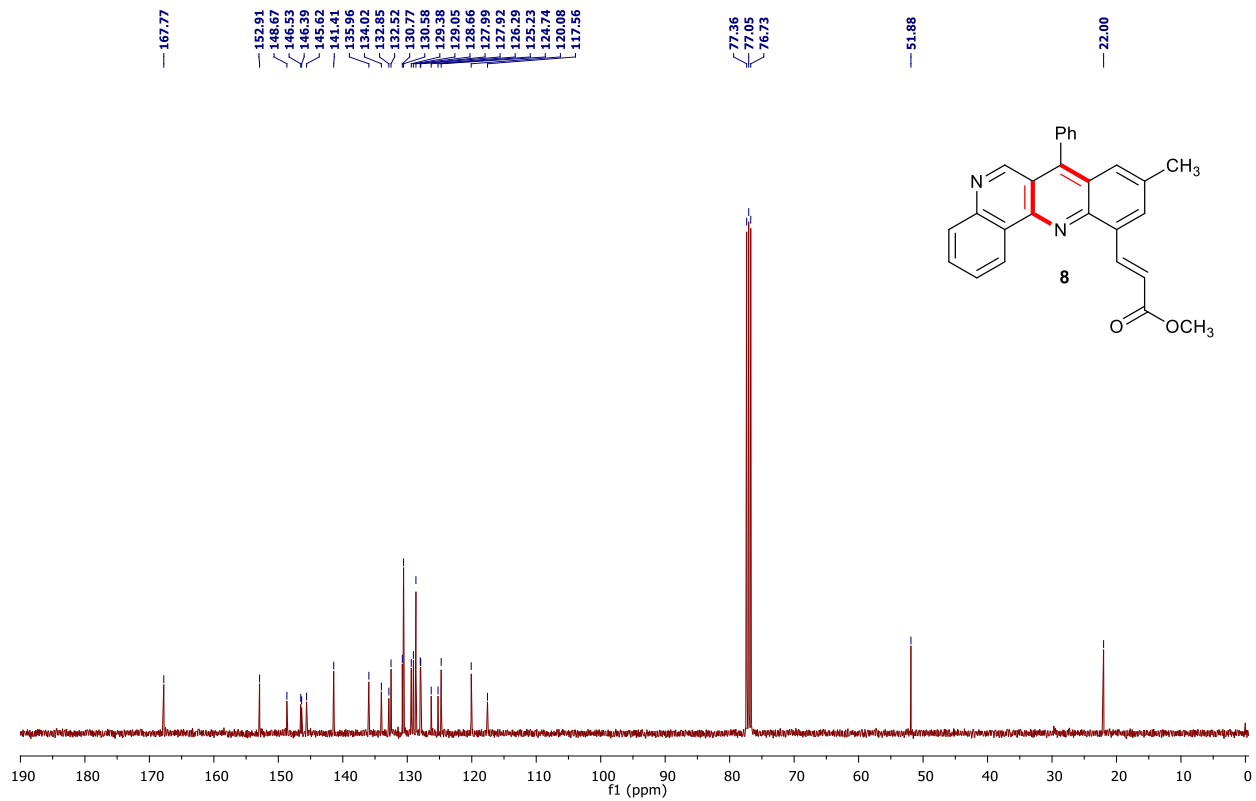

Supplement: d2ob01216b1.pdf [file d2ob01216b1.pdf]
